# Supplementary material for: New insight into HCV E1/E2 region of genotype 4a
Source: Springer Nature journal article supplement (doi:10.1186/s12985-014-0231-y), 2014-12-01
Supplement: MOESM2 [file 9770054]

CLUSTAL multiple sequence alignment by MUSCLE (3.8)

```

7A      CTTGGCCCTCTCTCGTGCTGACTGTCCCCGCCCTCGGCCATCAACTATCACAATACTTCG
6B      CCTGGCCCTCTCTCGTGCTGACTGTCCCCGCCTTCGGCCATCAACTATCACAATACTTCG
9D      TCTGGCCCTCTCTCGTGCTGACTGTCCCCGCCTTCGGCCATCAACTACCACAATACTTCG
1D      CTTGGCCCTCTCTCGTGCTGACTGTCCCCGCCTTCGGCCATCAACTATCACAATACTTCG
8E      CCTGGCTCTCTCGTGCCCTGACTGTCCCCGCCTTCGGCCATCAACTATCACAATACTTCG
9A      TTTGGGCTTCTCTCGTGCTGACTGTCCCCGCCTTCGGCCATCAACTATCACAATACTTCG
10D     TCTTGGCCTCTCTCGTGCTGACTGTCCCCGCCTTCGGCCATCAACTATCACAATACTTCA
3D      TTCTGGCTTCTCTCGTGCTGACTGTCCCCGCCTTCGGCCATCAACTATCACAATACTTCA
4D      TCTTGGCCTCTCTCGTGCTGACTGTCCCCGCCTTCGGCCATCAACTATCACAATACTTCA
5D      TCTTGGCCTCTCTCGTGCTGACTGTCCCCGCCTTCGGCCATCAACTATCACAATACTTCA
10B     CTTGGCCCTCTCTCGTGCTGACTGTCCCCGCCTTCGGCCATCAACTATCACAATACTTCA
5E      TCTTGGCCTCTCTCGTGCTGACTGTCCCCGCCTTCGGCCATCAACTATCACAATACTTCA
1E      TCTTGGCCTCTCTCGTGCTGACTGTCCCCGCCTTCGGCCATCAACTATCACAATACTTCA
7D      TCTTGGCCTCTCTCGTGCTGACTGTCCCCGCCTTCGGCCATCAACTATCACAATACTTCA
2D      CCTTGGCCTCTCTCGTGCTGACTGTCCCCGCCTTCGGCCATCAACTATCACAATACTTCA
2E      TCTTGGCCTCTCTCGTGCTGACTGTCCCCGCCTTCGGCCATCAACTATCACAATACTTCA
6E      TCTTGGCCTCTCTCGTGCTGACTGTCCCCGCCTTCGGCCATCAACTATCACAATACTTCA
2B      TCCTGGCCTCTCTCGTGCTGACTGTCCCCGCCTTCGGCCATCAACTATCACAATACTTCG
3B      CTTGGCCCTCTCTCGTGCTGACTGCCCCGCCTTCGGCCATCAACTATCACAATACTTCG
6D      CTTGGCCCTCTCTCGTGCTGACTGCCCCGCCTTCGGCCATCAACTATCACAATACTTCG
9C      TTTTTGGCTCTCTCGTGCTGACTGTCCCCGCCTTCGGCCATCATCTATCACAATACTTCG
2C      CTCTTGGCTCTCTCGTGCTGACTGTCCCCGCCTTCGGCCATCAACTATCACAATACTTCG
5A      TTCTTGGCTCTCTCGTGCTGACTGTCCCCGCCTTCGGCCATCAACTATCACAATACTTCG
8A      CTTGGCCCTCTCTCGTGCTGACTGTCCCCGCCTTCGGCCATCAACTATCACAATACTTCG
3E      TTCTTGGCTCTCTCGTGCTGACTGTCCCCGCCTTCGGCCATCAACTATCACAATACTTCG
4E      TCCTTGGCTCTCTCGTGCTGACTGTCCCCGCCTTCGGCCATCAACTATCACAATACTTCG
10A     TCTTGGACTCTCTCGTGCTGACTGTCCCCGCCTTCGGCCATCAACTATCACAATACTTCG
7B      TCTTGGCCTCTCTCGTGCTGACTGTCCCCGCCTTCGGCCATCAACTATCACAATACTTCG
6C      TCTTGGCCTCTCTCGTGCTGACTGTCCCCGCCTTCGGCCATCATCTATCACAATACTTCG
8C      TCTCTGGCTCTCTCGTGCTGACTGTCCCCGCCTTCGGCCATCATCTATCACAATACTTCG
1C      TTCTTGGCTCTCTCGTGCTGACTGTCCCCGCCTTCGGCCATCATCTATCACAATACTTCG
4C      TTTCTGGCTCTCTCGTGCTGACTGTCCCCGCCTTCGGCCATCATCTATCACAATACTTCG
7C      TTCCTGCCTCTCTCGTGCTGACTGTCCCCGCCTTCGGCCATCATCTATCACAATACTTCG
10C     TTCTTGCCTCTCTCGTGCTGACTGTCCCCGCCTTCGGCCATCATCTATCACAATACTTCG
5C      TTCTTGGCTCTCTCGTGCTGACTGTCCCCGCCTTCGGCCATCATCTATCACAATACTTCG
3C      TTCTTGGCTCTCTCGTGCTGACTGTCCCCGCCTTCGGCCATCATCTATCACAATACTTCG

```

\*\*\*\* \* \*\*\*\*\* \*\*\*\* \* \*\*\*\*\* \*\*\*\* \*\*\*\*\*

```

7A      GGCATCTACCATGTCACCAACGACTGCCCTAATTCAAGTATAGTATATGAGGCCGACCAT
6B      GGCATCTACCATGTCACCAATGACTGCCCTAACTCAAGTATAGTATATGAGGCCGACCAT
9D      GGCATCTACCATGTCACCAACGACTGCCCTAACTCAAGTATAGTATATGAGGCCGACCAT
1D      GGCATCTACCACCTTCCAACGACTGCCCTAACTCAAGTATAGTATATGAGGCCGACCAT
8E      GGCATCTACCATGTCACCAACGACTGCCCTAACTCAAGTATAGTATATGAGGCCGACCAT
9A      GGCATCTACCATGTCACCAACGACTGCCCTAATTCAAGTATAGTATATGAGGCCGACCAC
10D     GGCATCTACCATGTCACCAACGACTGCCCTAATTCAAGTATAGTATATGAGGCCGACCAT
3D      GGCATCTACCATGTCACCAACGACTGCCCTAATTCAAGTATAGTATATGAGGCCGACCAT
4D      GGCATCTACCATGTCACCAACGACTGCCCTAATTCAAGTATAGTATATGAGGCCGACCAT
5D      GGCATCTACCATGTCACCAACGACTGCCCTAATTCAAGTATAGTATATGAGGCCGACCAT
10B     GGCATCTACCATGTCACCAACGACTGCCCTAATTCAAGTATAGTATATGAGGCCGACCAT
5E      GGCATCTACCATGTAACCAACGACTGCCCTAATTCAAGTATAGTATATGAGGCCGACCAT
1E      GGCATCTACCATGTCACCAACGACTGCCCTAATTCAAGTATAGTATATGAGGCCGACCAT
7D      GGCATCTACCATGTCACCAACGACTGCCCTAATTCAAGTATAGTATATGAGGCCGACCAT
2D      GGCATCTACCATGTCACCAACGACTGCCCTAATTCAAGTATAGTATATGAGGCCGACCAT

```

2E GGTATCTACCATGTCACCAACGACTGCCCTAATTCAAGTATAGTATATGAGGCCGACCAT  
6E GGCATCTACCATGTCTCCAACGACTGCCCTAATTCAAGTATAGTATATGAGGCCGACCAT  
2B GGCATCTACCATGTCACCAACGACTGCCCTAACTCAAGTATAGTATATGAGGCCGACCAT  
3B GGCATCTACCCCCTCTACAAAGACTGCCCTAATTCAAGTATAGTATATGAGGCCGACCAT  
6D GGCATCTACCCCCTCTCCAACGACTGCCCTAATTCAAGTATAATATATGAGGCCGACCAT  
9C GGCATCTACCATGTCACCAACGACTGCCCTAATTCAAGTATAGTATATGAGGCCGACCAT  
2C GGCATCTACCCCCTCTCCAACGACTGCCCTAATTCAAGTATAGTATATGAGGCCGACCAT  
5A GGCATCTACCATGTCACCAACGACTGCCCTAATTCAAGTATAGTATATGAGGCCGACCAT  
8A GGCATCTACCATGTCACCAACGACTGCCCTAATTCAAGTATAGTATATGAGGCCGACCAT  
3E GGCATCTACCATGTCACCAACGACTGCCCTAATTCAAGTATAGTATATGAGGCCGACCAT  
4E GGCATCTACCATGTCACCAACGACTGCCCTAATTCAAATATAGTATATGAGGCCGACCAT  
10A GGCATCTACCATGTCACCAACGACTGCCCTAATTCAAGTATAGTATATGAGGCCGACCAT  
7B GGCATCTACCATGTCACCAACGACTGCCCTAATTCAAGTATAGTATATGAGGCCGACCAT  
6C GGCATCTACCATGTCACCAACGACTGCCCTAATTCAAGTATAGTATATGAGGCCGACCAT  
8C GGCATCTACCATGTCACCAACGACTGCCCTAATTCAAGTATAGTATATGAGGCCGACCAT  
1C GGCATCTACCATGTCACCAACGACTGCCCTAATTCAAGTATAGTATATGAGGCCGACCAT  
4C GGCATCTACCATGTCACCAACGACTGCCCTAATTCAAGTATAGTATATGAGGCCGACCAT  
7C GGCATCTACCATGTCACCAACGACTGCCCTAATTCAAGTATAGTATATGAGGCCGACCAT  
10C GGCATCTACCATGTCACCAACGACTGCCCTAATTCAAGTATAGTATATGAGGCCGACCAT  
5C GGCATCTACCATGTCACCAACGACTGCCCTAATTCAAGTATAGTATATGAGGCCGACC  
3C GGCATCTACCATGTCACCAACGACTGCCCTAATTCAAGTATAGTATATGAGGCCGACCAT  
\*\* \*\*\*\*\* \*\*

7A CACATCCTGCACCTTCCAGGTTGCGTGCCCTGTGTGAGAAGCGGAAATCAGTCACATTGC  
6B CACATCCTGCACCTTCCAGGTTGCGTGCCCTGTGTGAGAAGCGGAAATCAGTCACATTGC  
9D CACATCCTGCACCTTCCAGGTTGCGTGCCCTGTGTGAGAAGCGGAAATCAGTCACATTGC  
1D CACATCCTGCACCTCCCAGGTTGCGTGCCCTGTGTGAGAAGCGGAAATCAGTCACATTGC  
8E CACATCCTGCACCTCCCAGGTTGCGTGCCCTGTGTGAGAAGCGGAAATCAGTCACATTGC  
9A CACATCCTGCACCTCCCAGGTTGCGTGCCCTGTGTGAGAAGCGGAAATCAGTCACATTGC  
10D CACATCCTGCACCTCCCAGGTTGCGTGCCCTGTGTGAGAAGCGGAAATCAGTCACATTGC  
3D CACATCCTGCACCTCCCAGGTTGCGTGCCCTGTGTGAGAAGCGGAAATCAGTCACATTGC  
4D CACATCCTGCACCTCCCAGGTTGCGTGCCCTGTGTGAGAAGCGGAAATCAGTCACATTGC  
5D CACATCCTGCACCTCCCAGGTTGCGTGCCCTGTGTGAGAAGCGGAAATCAGTCACATTGC  
10B CACATCCTGCACCTCCCAGGTTGCGTGCCCTGTGTGAGAAGCGGAAATCAGTCACATTGC  
5E CACATCCTGCACCTCCCAGGTTGCGTGCCCTGTGTGAGAAGCGGAAATCAGTCACATTGC  
1E CACATCCTGCACCTCCCAGGTTGCGTGCCCTGTGTGAGAAGCGGAAATCAGTCACATTGC  
7D CACATCCTGCACCTCCCAGGTTGCGTGCCCTGTGTGAGAAGCGGAAATCAGTCACATTGC  
2D CACATCCTGCACCTCCCAGGTTGCGTGCCCTGTGTGAGAAGCGGAAATCAGTCACATTGC  
2E CACATCCTGCACCTCCCAGGTTGCGTGCCCTGTGTGAGAAGCGGAAATCAGTCACATTGC  
6E CACATCCTGCACCTCCCAGGTTGCGTGCCCTGTGTGAGAAGCGGAAATCAGTCACATTGC  
2B CACATCCTGCGCCTCCCAGGTTGCGTGCCCTGTGTGAGAAGCGGAAATCAGTCACATTGC  
3B CACATCCTGCACCTTCCAGGTTGCGTGCCCTGTGTGAGAAGCGGAAATCAGTCACATTGC  
6D CACATCCTGCACCTTCCAGGTTGCGTGTCTGTGTGAGAAGCGGAAATCAGTCACATTGC  
9C CACATCCTGCACCTTCCAGGTTGCGTGCCCTGTGTGAGAAGCGGAAATCAGTCACATTGC  
2C CACATCCTGCACCTTCCAGGTTGCGTGCCCTGTGTGAGAAGCGGAAATCAGTCACATTGC  
5A CACATCCTGCACCTTCCAGGTTGCGTGTCTGTGTGAGAAGCGGAAATCAGTCACATTGC  
8A CACATCCTGCACCTTCCAGGTTGCGTGCCCTGTGTGAGAAGCGGAAATCAGTCACATTGC  
3E CACATCCTGCACCTTCCAGGTTGCGTGTCTGTGTGAGAAGCGGAAATCAGTCACATTGC  
4E CACATCCTGCACCTTCCAGGTTGCGTGTCTGTGTGAGAAGCGGAAATCAGTCACATTGC  
10A CACATCCTGCACCTTCCAGGTTGCGTGCCCTGTGTGAGAAGCGGAAATCAGTCACATTGC  
7B CACATCCTGCACCTTCCAGGTTGCGTGCCCTGTGTGAGAAGCGGAAATCAGTCACATTGC  
6C CACATCCTGCACCTTCCAGGTTGCGTGCCCTGTGTGAGAAGCGGAAATCAGTCACATTGC  
8C CACATCCTGCACCTTCCAGGTTGCGTGCCCTGTGTGAGAAGCGGAAATCAGTCACATTGC  
1C CACATCCTGCACCTTCCAGGTTGCGTGCCCTGTGTGAGAAGCGGAAATCAGTCACATTGC  
4C CACATCCTGCACCTTCCAGGTTGCGTGCCCTGTGTGAGAAGCGGAAATCAGTCACATTGC  
7C CACATCCTGCACCTTCCAGGTTGCGTGCCCTGTGTGAGAAGCGGAAATCAGTCACATTGC  
10C CACATCCTGCACCTTCCAGGTTGCGTGCCCTGTGTGAGAAGCGGAAATCAGTCACATTGC

5C CACATCCTGCACCTTCCAGGTTGCGTGCCCTGTGTGAGAAGCGGAAATCAGTCACATTGC  
3C CACATCCTGCACCTTCCAGGTTGCGTGCCCTGTGTGAGAAGCGGAAATCAGTCACATTGC  
\*\*\*\*\* \*\*

7A TGGGTGGCCCTTACTCCTACCGTCGCAGCGCCATACATCGGTGCTCCACTTGAGTCCCTG  
6B TGGGTGGCCCTCACTCCTACCGTCGCAGCGCCGTACATCGGCGCTCCACTTGAGTCCCTG  
9D TGGGTGGCCCTTACTCCTACCGTCGCAGCGCCGTACATCGGCGCTCCACTTGAGTCCCTG  
1D TGGGTGGCCCTTACTCCTACCGTCGCAGCGCCGTACATCGGCGCTCCACTTGAGTCCCTG  
8E TGGGTGGCCCTTACTCCTACCGTCGCAGCGCCGTACATCGGCGCTCCACTTGAGTCCCTG  
9A TGGGTGGCCCTTACTCCTACCGTCGCAGCGCCATACATCGGCGCTCCACTTGAGTCCCTG  
10D TGGGTGGCCCTCACTCCTACCGTCGCAGCGCCATACATCGGCGCTCCACTTGAGTCCCTG  
3D TGGGTGGCCCTCACTCCTACCGCCGCAGCGCCATACATCGGCGCTCCACTTGAGTCCCTG  
4D TGGGTGGCCCTCACTCCTACCGCCGCAGCGCCATACATCGGCGCTCCACTTGAGTCCCTG  
5D TGGGTGGCCCTCACTCCTACCGCCGCAGCGCCATACATCGGCGCTCCACTTGAGTCCCTG  
10B TGGGTGGCCCTCACTCCTACCGCCGCAGCGCCATACATCGGCGCTCCACTTGAGTCCCTG  
5E TGGGTGGCCCTCACTCCTACCGCCGCAGCGCCATACATCGGCGCTCCACTTGAGTCCCTG  
1E TGGGTGGCCCTCACTCCTACCGCCGCAGCGCCATACATCGGCGCTCCACTTGAGTCCCTG  
7D TGGGTGGCCCTCACTCCTACCGCCGCAGCGCCATACATCGGCGCTCCACTTGAGTCCCTG  
2D TGGGTGGCCCTCACTCCTACCGCCGCAGCGCCATACATCGGCGCTCCACTTGAGTCCCTG  
2E TGGGTGGCCCTCACTCCTACCGCCGCAGCGCCATACATCGGCGCTCCACTTGAGTCCCTG  
6E TGGGTGGCCCTCACTCCTACCGCCGCAGCGCCATACATCGGCGCTCCACTTGAGTCCCTG  
2B TGGGTGGCCCTTACTCCTACCGTCGCAGCGCCATACATCGGTGCTCCACTTGAGTCCCTG  
3B TGGGTGGCCCTTACTCCTACCGTCGCAGCGCCATACATCGGTGCTCCACTTGAGTCCCTG  
6D TGGGTGGCCCTTACTCCTACCGTCGCAGCGCCATACATCGGTGCTCCACTTGAGTCCCTG  
9C TGGGTGGCCCTTACTCCTACCGTCGCAGCGCCATACATCGGTGCTCCACTTGAGTCCCTG  
2C TGGGTGGCCCTTACTCCTACCGTCGCAGCGCCATACATCGGTGCTCCACTTGAGTCCCTG  
5A TGGGTGGCCCTTACTCCTACCGTCGCAGCGCCATACATCGGTGCTCCACTTGAGTCCCTG  
8A TGGGTGGCCCTTACTCCTACCGTCGCAGCGCCATACATCGGTGCTCCACTTGAGTCCCTG  
3E TGGGTGGCCCTTACTCCTACCGTCGCAGCGCCATACATCGGTGCTCCACTTGAGTCCCTG  
4E TGGGTGGCCCTTACTCCTACCGTCGCAGCGCCATACATCGGTGCTCCACTTGAGTCCCTG  
10A TGGGTGGCCCTTACTCCTACCGTCGCAGCGCCATACATCGGTGCTCCACTTGAGTCCCTG  
7B TGGGTGGCCCTTACTCCTACCGTCGCAGCGCCATACATCGGTGCTCCACTTGAGTCCCTG  
6C TGGGTGGCCCTTACTCCTACCGTCGCAGCGCCATACATCGGTGCTCCACTTGAGTCCCTG  
8C TGGGTGGCCCTTACTCCTACCGTCGCAGCGCCATACATCGGTGCTCCACTTGAGTCCCTG  
1C TGGGTGGCCCTTACTCCTACCGTCGCAGCGCCATACATCGGTGCTCCACTTGAGTCCCTG  
4C TGGGTGGCCCTTACTCCTACCGTCGCAGCGCCATACATCGGTGCTCCACTTGAGTCCCTG  
7C TGGGTGGCCCTTACTCCTACCGTCGCAGCGCCATACATCGGTGCTCCACTTGAGTCCCTG  
10C TGGGTGGCCCTTACTCCTACCGTCGCAGCGCCATACATCGGTGCTCCACTTGAGTCCCTG  
5C TGGGTGGCCCTTACTCCTACCGTCGCAGCGCCATACATCGGTGCTCCACTTGAGTCCCTG  
3C TGGGTGGCCCTTACTCCTACCGTCGCAGCGCCATACATCGGTGCTCCACTTGAGTCCCTG  
\*\*\*\*\* \*\*

7A CGGAGTCATGTGGATCTGATGGTCGGGGCTGCCACTGCTTGTTCAGCCCTTTACATTGGG  
6B CGGAGTCATGTGGATCTGATGGTCGGGGCTGCCACTGCTTGTTCAGCCCTTTACATTGGG  
9D CGGAGTCATGTGGATCTGATGGTCGGGGCTGCCACTGCTTGTTCAGCCCTTTACATTGGG  
1D CGGAGTCATGTGGATCTGATGGTCGGGGCTGCCACTGCTTGTTCAGCCCTTTACATTGGG  
8E CGGAGTCATGTGGATCTGATGGTCGGGGCTGCCACTGCTTGTTCAGCCCTTTACATTGGG  
9A CGGAGTCATGTGGATCTGATGGTCGGGGCTGCCACTGCTTGTTCAGCCCTTTACATTGGG  
10D CGGAGTCATGTGGATCTGATGGTCGGGGCTGCCACTGCTTGTTCAGCCCTTTACATTGGG  
3D CGGAGTCATGTGGATCTGATGGTCGGGGCTGCCACTGCTTGTTCAGCCCTTTACATTGGG  
4D CGGAGTCATGTGGATCTGATGGTCGGGGCTGCCACTGCTTGTTCAGCCCTTTACATTGGG  
5D CGGAGTCATGTGGATCTGATGGTCGGGGCTGCCACTGCTTGTTCAGCCCTTTACATTGGG  
10B CGGAGTCATGTGGATCTGATGGTCGGGGCTGCCACTGCTTGTTCAGCCCTTTACATTGGG  
5E CGGAGTCATGTGGATCTGATGGTCGGGGCTGCCACTGCTTGTTCAGCCCTTTACATTGGG  
1E CGGAGTCATGTGGATCTGATGGTCGGGGCTGCCACTGCTTGTTCAGCCCTTTACATTGGG  
7D CGGAGTCATGTGGATCTGATGGTCGGGGCTGCCACTGCTTGTTCAGCCCTTTACATTGGG  
2D CGGAGTCATGTGGATCTGATGGTCGGGGCTGCCACTGCTTGTTCAGCCCTTTACATTGGG

2E CGGAGTCATGTGGATCTGATGGTCGGGGCTGCCACTGCTTGTTTCAGCCCTTTACATTGGG  
6E CGGAGTCATGTGGATCTGATGGTCGGGGCTGCCACTGCTTGTTTCAGCCCTTTACATTGGG  
2B CGGAGTCATGTGGATCTGATGGTCGGGGCTGCCACTGCTTGTTTCAGCCCTTTACATTGGG  
3B CGGAGTCATGTGGATCTGATGGTCGGGGCTGCCACTGCTTGTTTCAGCCCTTTACATTGGG  
6D CGGAGTCATGTGGATCTGATGGTCGGGGCTGCCACTGCTTGTTTCAGCCCTTTACATTGGG  
9C CGGAGTCATGTGGATTTGATGGTCGGGGCTGCCACTGCTTGTTTCAGCCCTTTACATTGGG  
2C CGGAGTCATGTGGATCTGATGGTCGGGGCTGCCACTGCTTGTTTCAGCCCTTTACATTGGG  
5A CGGAGTCATGTGGATCTGATGGTCGGGGCTGCCACTGCTTGTTTCAGCCCTTTACATTGGG  
8A CGGAGTCATGTGGATCTGATGGTCGGGGCTGCCACTGCTTGTTTCAGCCCTTTACATTGGG  
3E CGGAGTCATGTGGATCTGATGGTCGGGGCTGCCACTGCTTGTTTCAGCCCTTTACATTGGG  
4E CGGAGTCATGTGGATCTGATGGTCGGGGCTGCCACTGCTTGTTTCAGCCCTTTACATTGGG  
10A CGGAGTCATGTGGATCTGATGGTCGGGGCTGCCACTGCTTGTTTCAGCCCTTTACATTGGG  
7B CGGAGTCATGTGGATCTGATGGTCGGGGCTGCCACTGCTTGTTTCAGCCCTTTACATTGGG  
6C CGGAGTCATGTGGATCTGATGGTCGGGGCTGCCACTGCTTGTTTCAGCCCTTTACATTGGG  
8C CGGAGTCATGTGGATCTGATGGTCGGGGCTGCCACTGCTTGTTTCAGCCCTTTACATTGGG  
1C CGGAGTCATGTGGATCTGATGGTCGGGGCTGCCACTGCTTGTTTCAGCCCTTTACATTGGG  
4C CGGAGTCATGTGGATCTGATGGTCGGGGCTGCCACTGCTTGTTTCAGCCCTTTACATTGGG  
7C CGGAGTCATGTGGATCTGATGGTCGGGGCTGCCACTGCTTGTTTCAGCCCTTTACATTGGG  
10C CGGAGTCATGTGGATCTGATGGTCGGGGCTGCCACTGCTTGTTTCAGCCCTTTACATTGGG  
5C CGGAGTCATGTGGATCTGATGGTCGGGGCTGCCACTGCTTGTTTCAGCCCTTTACATTGGG  
3C CGGAGTCATGTGGATCTGATGGTCGGGGCTGCCACTGCTTGTTTCAGCCCTTTACATTGGG  
\*\*\*\*\*

7A GATCTATGTGGCAGCTTGTTCTTGGTTGGTCAGATGTTCTCTTTCCGACCACGGCGCCAC  
6B GATCTATGTGGCGGTTTGGTTCTTGGTTGGTCAGATGTTCTCTTTCCGACCACGGCGCCAC  
9D GATCTATGTGGCGGTTTGGTTCTTGGTTGGTCAGATGTTCTCTTTCCGACCACGGCGCCAC  
1D GATCTATGTGGCGGTTTGGTTCTTGGTTGGTCAGATGTTCTCTTTCCGACCACGGCGCCAC  
8E GATCTATGTGGCGGTTTGGTTCTTGGTTGGTCAGATGTTCTCTTTCCGACCACGGCGCCAC  
9A GATCTATGTGGCGGTTTGGTTCTTGGTTGGTCAGATGTTCTCTTTCCGACCACGGCGCCAC  
10D GATCTATGTGGCGGTTTGGTTCTTGGTTGGTCAGATGTTCTCTTTCCGACCACGGCGCCAC  
3D GATCTATGTGGCGGTTTGGTTCTTGGTTGGTCAGATGTTCTCTTTCCGACCACGGCGCCAC  
4D GATCTATGTGGCGGTTTGGTTCTTGGTTGGTCAGATGTTCTCTTTCCGACCACGGCGCCAC  
5D GATCTATGTGGCGGTTTGGTTCTTGGTTGGTCAGATGTTCTCTTTCCGACCACGGCGCCAC  
10B GATCTATGTGGCGGTTTGGTTCTTGGTTGGTCAGATGTTCTCTTTCCGACCACGGCGCCAC  
5E GATCTATGTGGCGGTTTGGTTCTTGGTTGGTCAGATGTTCTCTTTCCGACCACGGCGCCAC  
1E GATCTATGTGGCGGTTTGGTTCTTGGTTGGTCAGATGTTCTCTTTCCGACCACGGCGCCAC  
7D GATCTATGTGGCGGTTTGGTTCTTGGTTGGTCAGATGTTCTCTTTCCGACCACGGCGCCAC  
2D GATCTATGTGGCGGTTTGGTTCTTGGTTGGTCAGATGTTCTCTTTCCGACCACGGCGCCAC  
2E GATCTATGTGGCGGTTTGGTTCTTGGTTGGTCAGATGTTCTCTTTCCGACCACGGCGCCAC  
6E GATCTATGTGGCGGTTTGGTTCTTGGTTGGTCAGATGTTCTCTTTCCGACCACGGCGCCAC  
2B GATTTATGTGGCGGCTTGGTTCTTGGTTGGTCAGATGTTCTCTTTCCGACCACGGCGCCAC  
3B GATCTATGTGGCGGCTTGGTTCTTGGTTGGTCAGATGTTCTCTTTCCGACCACGGCGCCAC  
6D GATCTATGTGGCAGCTTGTTCTTGGTTGGTCAGATGTTCTCTTTCCGACCACGGCGCCAC  
9C GATTTATGTGGCAGCTTGTTCTTGGTTGGTCAGATGTTCTCTTTCCGACCACGGCGCCAC  
2C GATCTATGTGGCAGCTTGTTCTTGGTTGGTCAGATGTTCTCTTTCCGACCACGGCGCCAC  
5A GATCTATGTGGCGGCTTGGTTCTTGGTTGGTCAGATGTTCTCTTTCCGACCACGGCGCCAC  
8A GATCTATGTGGCAGCTTGTTCTTGGTTGGTCAGATGTTCTCTTTCCGACCACGGCGCCAC  
3E GATCTATGTGGCAGCTTGTTCTTGGTTGGTCAGATGTTCTCTTTCCGACCACGGCGCCAC  
4E GATCTATGTGGCAGCTTGTTCTTGGTTGGTCAGATGTTCTCTTTCCGACCACGGCGCCAC  
10A GATCTATGTGGCAGCTTGTTCTTGGTTGGTCAGATGTTCTCTTTCCGACCACGGCGCCAC  
7B GATCTATGTGGCAGCTTGTTCTTGGTTGGTCAGATGTTCTCTTTCCGACCACGGCGCCAC  
6C GATCTATGTGGCAGCTTGTTCTTGGTTGGTCAGATGTTCTCTTTCCGACCACGGCGCCAC  
8C GATCTATGTGGCAGCTTGTTCTTGGTTGGTCAGATGTTCTCTTTCCGACCACGGCGCCAC  
1C GATCTATGTGGCAGCTTGTTCTTGGTTGGTCAGATGTTCTCTTTCCGACCACGGCGCCAC  
4C GATCTATGTGGCAGCTTGTTCTTGGTTGGTCAGATGTTCTCTTTCCGACCACGGCGCCAC  
7C GATCTATGTGGCAGCTTGTTCTTGGTTGGTCAGATGTTCTCTTTCCGACCACGGCGCCAC  
10C GATCTATGTGGCAGCTTGTTCTTGGTTGGTCAGATGTTCTCTTTCCGACCACGGCGCCAC

5C GATCTATGTGGCAGCTTGTTCCTGGTTGGTCAGATGTTCTCTTTCCGACCACGGCGCCAC  
 3C GATCTATGTGGCAGCTTGTTCCTGGTTGGTCAGATGTTCTCTTTCCGACCACGGCGCCAC  
 \*\*\* \*\*\*\*\* \* \*\*\*\*\*

7A TGGACTACCCAGGATTGCAATTGCTCCATCTATAACGGGTCATATCACTGGCCATAGAATG  
 6B TGGACTACCCAGGATTGCAATTGTTCCATCTATAACGGGTCATATCACTGGCCACAGAATG  
 9D TGGACTACCCAGGATTGCAATTGTTCCATCTATAACGGGTCATATCACTGGCCACAGAATG  
 1D TGGACTACCCAGGATTGCAATTGTTCCATCTATAACGGGTCATATCACTGGCCACAGAATG  
 8E TGGACTACCCAGGATTGCAATTGTTCCATCTATAACGGGTCATATCACTGGCCACAGAATG  
 9A TGGACTACCCAGGACTGCAATTGTTCCATCTATAACGGGTCATATCACTGGCCACAGAATG  
 10D TGGACTACCCAGGATTGCAATTGTTCCATCTATAACGGGTCATATCACTGGCCACAGAATG  
 3D TGGACTACCCAGGATTGCAATTGTTCCATCTATAACGGGTCATATCACTGGCCACAGAATG  
 4D TGGACTACCCAGGATTGCAATTGTTCCATCTATAACGGGTCATATCACTGGCCACAGAATG  
 5D TGGACTACCCAGGATTGCAATTGTTCCATCTATAACGGGTCATATCACTGGCCACAGAATG  
 10B TGGACTACCCAGGATTGCAATTGTTCCATCTATAACGGGTCATATCACTGGCCACAGAATG  
 5E TGGACTACCCAGGATTGCAATTGTTCCATCTATAACGGGTCATATCACTGGCCACAGAATG  
 1E TGGACTACCCAGGATTGCAATTGTTCCATCTATAACGGGTCATATCACTGGCCACAGAATG  
 7D TGGACTACCCAGGATTGCAATTGTTCCATCTATAACGGGTCATATCACTGGCCACAGAATG  
 2D TGGACTACCCAGGATTGCAATTGTTCCATCTATAACGGGTCATATCACTGGCCACAGAATG  
 2E TGGACTACCCAGGATTGCAATTGTTCCATCTATAACGGGTCATATCACTGGCCACAGAATG  
 6E TGGACTACCCAGGATTGCAATTGTTCCATCTATAACGGGTCATATCACTGGCCACAGAATG  
 2B TGGACTACCCAGGATTGCAATTGCTCCATCTATAACGGGTCATATCACTGGCCACAGAATG  
 3B TGGACTACCCAGGATTGCAATTGCTCCATCTATAACGGGTCATATCACTGGCCATAGAATG  
 6D TGGACTACCCAGGATTGCAATTGCTCCATCTATAACGGGTCATATCACTGGCCATAGAATG  
 9C TGGACTACCCAGGATTGCAATTGCTCCACCTATAACGGGTCATATCACTGGCCATAGAATG  
 2C TGGACTACCCAGGATTGCAATTGCTCCACCTATAACGGGTCATATCACTGGCCATAGAATG  
 5A TGGACTACCCAGGATTGCAATTGCTCCATCTATAACGGGTCATATCACTGGCCATAGAATG  
 8A TGGACTACCCAGGATTGCAATTGCTCCATCTATAACGGGTCATATCACTGGCCATAGAATG  
 3E TGGACTACCCAGGATTGCAATTGCTCCATCTATAACGGGTCATATCACTGGCCATAGAATG  
 4E TGGACTACCCAGGATTGCAATTGCTCCATCTATAACGGGTCATATCACTGGCCATAGAATG  
 10A TGGACTACCCAGGATTGCAATTGCTCCATCTATAACGGGTCATATCACTGGCCATAGAATG  
 7B TGGACTACCCAGGATTGCAATTGCTCCATCTATAACGGGTCATATCACTGGCCATAGAATG  
 6C TGGACTACCCAGGATTGCAATTGCTCCATCTATAACGGGTCATATCACTGGCCATAGAATG  
 8C TGGACTACCCAGGATTGCAATTGCTCCATCTATAACGGGTCATATCACTGGCCATAGAATG  
 1C TGGACTACCCAGGATTGCAATTGCTCCATCTATAACGGGTCATATCACTGGCCATAGAATG  
 4C TGGACTACCCAGGATTGCAATTGCTCCATCTATAACGGGTCATATCACTGGCCATAGAATG  
 7C TGGACTACCCAGGATTGCAATTGCTCCATCTATAACGGGTCATATCACTGGCCATAGAATG  
 10C TGGACTACCCAGGATTGCAATTGCTCCATCTATAACGGGTCATATCACTGGCCATAGAATG  
 5C TGGACTACCCAGGATTGCAATTGCTCCATCTATAACGGGTCATATCACTGGCCATAGAATG  
 3C TGGACTACCCAGGATTGCAATTGCTCCATCTATAACGGGTCATATCACTGGCCATAGAATG  
 \*\*\*\*\* \*\*\*\*\* \*\*\*\*\* \*\*\*\*\*

7A GCCTGGGACATGATGATGAACTGGAGTCCAACAACCACCCTAGTTCTCGCCCAGGTTATG  
 6B GCCTGGGACATGATGATGAACTGGAGTCCAACAACCACCCTAGTTCTCGCCCAGGTTATG  
 9D GCCTGGGACATGATGATGAACTGGAGTCCAACAACCACCCTAGTTCTCGCCCAGGTTATG  
 1D GCCTGGGACATGATGATGAACTGGAGTCCAACAACCACCCTAGTTCTCGCCCAGGTTATG  
 8E GCCTGGGACATGATGATGAACTGGAGTCCAACAACCACCCTAGTTCTCGCCCAGGTTATG  
 9A GCCTGGGACATGATGATGAACTGGAGTCCAACAACCACCCTAGTTCTCGCCCAGGTTATG  
 10D GCCTGGGACATGATGATGAACTGGAGTCCAACAACCACCCTAGTTCTCGCCCAGGTTATG  
 3D GCCTGGGACATGATGATGAACTGGAGTCCAACAACCACCCTAGTTCTCGCCCAGGTTATG  
 4D GCCTGGGACATGATGATGAACTGGAGTCCAACAACCACCCTAGTTCTCGCCCAGGTTATG  
 5D GCCTGGGACATGATGATGAACTGGAGTCCAACAACCACCCTAGTTCTCGCCCAGGTTATG  
 10B GCCTGGGACATGATGATGAACTGGAGTCCAACAACCACCCTAGTTCTCGCCCAGGTTATG  
 5E GCCTGGGACATGATGATGAACTGGAGTCCAACAACCACCCTAGTTCTCGCCCAGGTTATG  
 1E GCCTGGGACATGATGATGAACTGGAGTCCAACAACCACCCTAGTTCTCGCCCAGGTTATG  
 7D GCCTGGGACATGATGATGAACTGGAGTCCAACAACCACCCTAGTTCTCGCCCAGGTTATG  
 2D GCCTGGGACATGATGATGAACTGGAGTCCAACAACCACCCTAGTTCTCGCCCAGGTTATG

2E GCCTGGGACATGATGATGAACTGGAGTCCAACAACCACCCTAGTTCTCGCCCAGGTTATG  
6E GCCTGGGACATGATGATGAACTGGAGTCCAACAACCACCCTAGTTCTCGCCCAGGTTATG  
2B GCCTGGGACATGATGATGAACTGGAGTCCAACAACCACCCTAGTTCTCGCCCAGGTTATG  
3B GCCTGGGACATGATGATGAACTGGAGTCCAACAACCACCCTAGTTCTCGCCCAGGTTATG  
6D GCCTGGGACATGATGATGAACTGGAGTCCAACAACCACCCTAGTTCTCGCCCAGGTTATG  
9C GCCTGGGACATGATGATGAACTGGAGTCCAACAACCACCCTAGTTCTCGCCCAGGTTATG  
2C GCCTGGGACATGATGATGAACTGGAGTCCAACAACCACCCTAGTTCTCGCCCAGGTTATG  
5A GCCTGGGACATGATGATGAACTGGAGTCCAACAACCACCCTAGTTCTCGCCCAGGTTATG  
8A GCCTGGGACATGATGATGAACTGGAGTCCAACAACCACCCTAGTTCTCGCCCAGGTTATG  
3E GCCTGGGACATGATGATGAACTGGAGTCCAACAACCACCCTAGTTCTCGCCCAGGTTATG  
4E GCCTGGGACATGATGATGAACTGGAGTCCAACAACCACCCTAGTTCTCGCCCAGGTTATG  
10A GCCTGGGACATGATGATGAACTGGAGTCCAACAACCACCCTAGTTCTCGCCCAGGTTATG  
7B GCCTGGGACATGATGATGAACTGGAGTCCAACAACCACCCTAGTTCTCGCCCAGGTTATG  
6C GCCTGGGACATGATGATGAACTGGAGTCCAACAACCACCCTAGTTCTCGCCCAGGTTATG  
8C GCCTGGGACATGATGATGAACTGGAGTCCAACAACCACCCTAGTTCTCGCCCAGGTTATG  
1C GCCTGGGACATGATGATGAACTGGAGTCCAACAACCACCCTAGTTCTCGCCCAGGTTATG  
4C GCCTGGGACATGATGATGAACTGGAGTCCAACAACCACCCTAGTTCTCGCCCAGGTTATG  
7C GCCTGGGACATGATGATGAACTGGAGTCCAACAACCACCCTAGTTCTCGCCCAGGTTATG  
10C GCCTGGGACATGATGATGAACTGGAGTCCAACAACCACCCTAGTTCTCGCCCAGGTTATG  
5C GCCTGGGACATGATGATGAACTGGAGTCCAACAACCACCCTAGTTCTCGCCCAGGTTATG  
3C GCCTGGGACATGATGATGAACTGGAGTCCAACAACCACCCTAGTTCTCGCCCAGGTTATG  
\*\*\*\*\*

7A AGGATCCCAGGCACTCTGCTAGACCTACTAGCTGGAGGCCACTGGGGTGTCTCGTGGGA  
6B AGGATCCCAGGCACTCTGCTAGACCTACTATCTGGAGGCCACTGGGGTGTCTCGTGGGA  
9D AGGATCCCAGGCACTCTGCTAGACCTACTAGCTGGAGGCCACTGGGGTGTCTCGTGGGA  
1D AGGATCCCAGGCACTCTGCTAGACCTACTAGCTGGAGGCCACTGGGGTGTCTCGTGGGA  
8E AGGATCCCAGGCACTCTGCTAGACCTACTAGCTGGAGGCCACTGGGGTGTCTCGTGGGA  
9A AGGATCCCAGGCACTCTGCTAGACCTACTAGCTGGAGGCCACTGGGGTGTCTCGTGGGA  
10D AGGATCCCAGGCACTCTGCTAGACCTACTTGCTGGAGGCCACTGGGGTGTCTCGTGGGA  
3D AGGATCCCAGGCACTCTGCTAGACCTACTTGCTGGAGGCCACTGGGGTGTCTCGTGGGA  
4D AGGATCCCAGGCACTCTGCTAGACCTACTTGCTGGAGGCCACTGGGGTGTCTCGTGGGA  
5D AGGATCCCAGGCACTCTGCTAGACCTACTTGCTGGAGGCCACTGGGGTGTCTCGTGGGA  
10B AGGATCCCAGGCACTCTGCTAGACCTACTTGCTGGAGGCCACTGGGGTGTCTCGTGGGA  
5E AGGATCCCAGGCACTCTGCTAGACCTACTTGCTGGAGGCCACTGGGGTGTCTCGTGGGA  
1E AGGATCCCAGGCACTCTGCTAGACCTACTTGCTGGAGGCCACTGGGGTGTCTCGTGGGA  
7D AGGATCCCAGGCACTCTGCTAGACCTACTTGCTGGAGGCCACTGGGGTGTCTCGTGGGA  
2D AGGATCCCAGGCACTCTGCTAGACCTACTTGCTGGAGGCCACTGGGGTGTCTCGTGGGA  
2E AGGATCCCAGGCACTCTGCTAGACCTACTTGCTGGAGGCCACTGGGGTGTCTCGTGGGA  
6E AGGATCCCAGGCACTCTGCTAGACCTACTTGCTGGAGGCCACTGGGGTGTCTCGTGGGA  
2B AGGATCCCAGGCACTCTGCTAGACCTACTTGCTGGAGGCCACTGGGGTGTCTCGTGGGA  
3B AGGATCCCAGGCACTCTGCTAGACCTACTTGCTGGAGGCCACTGGGGTGTCTCGTGGGA  
6D AGGATCCCAGGCACTCTGCTAGACCTACTTGCTGGAGGCCACTGGGGTGTCTCGTGGGA  
9C AGGATCCCAGGCACTCTGGTAAACCTACTTGCTGGAGGCCACTGGGGTGTCTCGTGGGA  
2C AGGATCCCAGGCACTCTGCTAGACCTACTTGCTGGAGGCCACTGGGGTGTCTCGTGGGA  
5A AGGATCCCAGGCACTCTGCTAGACCTACTTGCTGGAGGCCACTGGGGTGTCTCGTGGGA  
8A AGGATCCCAGGCACTCTGCTAGACCTACTTGCTGGAGGCCACTGGGGTGTCTCGTGGGA  
3E AGGATCCCAGGCACTCTGCTAGACCTACTTGCTGGAGGCCACTGGGGTGTCTCGTGGGA  
4E AGGATCCCAGGCACTCTGCTAGACCTACTTGCTGGAGGCCACTGGGGTGTCTCGTGGGA  
10A AGGATCCCAGGCACTCTGCTAGACCTACTTGCTGGAGGCCACTGGGGTGTCTCGTGGGA  
7B AGGATCCCAGGCACTCTGCTAGACCTACTTGCTGGAGGCCACTGGGGTGTCTCGTGGGA  
6C AGGATCCCAGGCACTCTGCTAGACCTACTTGCTGGAGGCCACTGGGGTGTCTCGTGGGA  
8C AGGATCCCAGGCACTCTGCTAGACCTACTTGCTGGAGGCCACTGGGGTGTCTCGTGGGA  
1C AGGATCCCAGGCACTCTGCTAGACCTACTTGCTGGAGGCCACTGGGGTGTCTCGTGGGA  
4C AGGATCCCAGGCACTCTGCTAGACCTACTTGCTGGAGGCCACTGGGGTGTCTCGTGGGA  
7C AGGATCCCAGGCACTCTGCTAGACCTACTTGCTGGAGGCCACTGGGGTGTCTCGTGGGA  
10C AGGATCCCAGGCACTCTGCTAGACCTACTTGCTGGAGGCCACTGGGGTGTCTCGTGGGA

5C AGGATCCCAGGTACTCTGCTAGACCTACTTGCTGGAGGCCACTGGGGCGCCCTCGTGGGA  
3C AGGATCCCAGGTACTCTGCTAGACCTACTTGCTGGAGGCCACTGGGGCGCCCTCGTGGGA  
\*\*\*\*\* \*\* \*\*\*\*\* \*\* \*\*\*\*\* \*\* \*\*\*\*\* \*\* \*\*\*\*\*

7A GTGGCCTATTT CAGCATGCAATCTAATTGGGCAAAAGTCATCCTAGTCCTATTTCTCTTT  
6B GTGGCCTATTT CAGCATGCAATCTAATTGGGCAAAAGTCATCCTAGTCCTATTTCTCTTT  
9D GTGGCCTATTT CAGCATGCAATCTAATTGGGCAAAAGTCATCCTAGTCCTATTTCTCTTT  
1D GTGGCCTATTT CAGCATGCAATCTAATTGGGCAAAAGTCATCCTAGTCCTATTTCTCTTT  
8E GTGGCCTATTT CAGCATGCAATCTAATTGGGCAAAAGTCATCCTAGTCCTATTTCTCTTT  
9A GTGGCCTATTT CAGCATGCAATCTAATTGGGCAAAAGTCATCCTAGTCCTATTTCTCTTT  
10D GTGGCCTATTT CAGCATGCAATCTAATTGGGCAAAAGTCATCCTAGTCCTATTTCTCTTT  
3D GTGGCCTATTT CAGCATGCAATCTAATTGGGCAAAAGTCATCCTAGTCCTATTTCTCTTT  
4D GTGGCCTATTT CAGCATGCAATCTAATTGGGCAAAAGTCATCCTAGTCCTATTTCTCTTT  
5D GTGGCCTATTT CAGCATGCAATCTAATTGGGCAAAAGTCATCCTAGTCCTATTTCTCTTT  
10B GTGGCCTATTT CAGCATGCAATCTAATTGGGCAAAAGTCATCCTAGTCCTATTTCTCTTT  
5E GTGGCCTATTT CAGCATGCAATCTAATTGGGCAAAAGTCATCCTAGTCCTATTTCTCTTT  
1E GTGGCCTATTT CAGCATGCAATCTAATTGGGCAAAAGTCATCCTAGTCCTATTTCTCTTT  
7D GTGGCCTATTT CAGCATGCAATCTAATTGGGCAAAAGTCATCCTAGTCCTATTTCTCTTT  
2D GTGGCCTATTT CAGCATGCAATCTAATTGGGCAAAAGTCATCCTAGTCCTATTTCTCTTT  
2E GTGGCCTATTT CAGCATGCAATCTAATTGGGCAAAAGTCATCCTAGTCCTATTTCTCTTT  
6E GTGGCCTATTT CAGCATGCAATCTAATTGGGCAAAAGTCATCCTAGTCCTATTTCTCTTT  
2B GTGGCCTATTT CAGCATGCAATCTAATTGGGCAAAAGTCATCCTAGTCCTATTTCTCTTT  
3B GTGGCCTATTT CAGCATGCAATCTAATTGGGCGAAAGTCATCCTAGTTCTATTTCTCTTT  
6D GTGGCCTATTT CAGCATGCAATCCAATTGGGCGAAAGTCATCCTAGTTCTATTTCTCTTT  
9C GTGGCCTATTT CAGCATGCAATCCAATTGGGCGAAAGTCATCCTAGTTCTATTTCTCTTT  
2C GTGGCCTATTT CAGCATGCAATCCAATTGGGCGAAAGTCATCCTAGTTCTATTTCTCTTT  
5A GTGGCCTATTT CAGCATGCAATCTAATTGGGCGAAAGTCATCCTAGTTCTATTTCTCTTT  
8A GTGGCCTATTT CAGCATGCAATCCAATTGGGCGAAAGTCATCCTAGTTCTATTTCTCTTT  
3E GTGGCCTATTT CAGCATGCAATCCAATTGGGCGAAAGTCATCCTAGTTCTATTTCTCTTT  
4E GTGGCCTATTT CAGCATGCAATCCAATTGGGCGAAAGTCATCCTAGTTCTATTTCTCTTT  
10A GTGGCCTATTT CAGCATGCAATCCAATTGGGCGAAAGTCATCCTAGTTCTATTTCTCTTT  
7B GTGGCCTATTT CAGCATGCAATCCAATTGGGCGAAAGTCATCCTAGTTCTATTTCTCTTT  
6C GTGGCCTATTT CAGCATGCAATCCAATTGGGCGAAAGTCATCCTAGTTCTATTTCTCTTT  
8C GTGGCCTATTT CAGCATGCAATCCAATTGGGCGAAAGTCATCCTAGTTCTATTTCTCTTT  
1C GTGGCCTATTT CAGCATGCAATCCAATTGGGCGAAAGTCATCCTAGTTCTATTTCTCTTT  
4C GTGGCCTATTT CAGCATGCAATCCAATTGGGCGAAAGTCATCCTAGTTCTATTTCTCTTT  
7C GTGGCCTATTT CAGCATGCAATCCAATTGGGCGAAAGTCATCCTAGTTCTATTTCTCTTT  
10C GTGGCCTATTT CAGCATGCAATCCAATTGGGCGAAAGTCATCCTAGTTCTATTTCTCTTT  
5C GTGGCCTATTT CAGCATGCAATCCAATTGGGCGAAAGTCATCCTAGTTCTATTTCTCTTT  
3C GTGGCCTATTT CAGCATGCAATCCAATTGGGCGAAAGTCATCCTAGTTCTATTTCTCTTT  
\*\*\*\*\* \*\* \*\*\*\*\* \*\* \*\*\*\*\* \*\* \*\*\*\*\* \*\* \*\*\*\*\*

7A GCAGGGGTTGACGCCAGCACTCGTGTGTCAGGGGGCGTGGTTTCTCACACCACCGCTGGC  
6B GCAGGGGTTGATGCCAGCACTCGTGTGTCAGGGGGCGTGGTTTCTCACACCACCGCTGGC  
9D GCAGGGGTTGACGCCAGCACTCGTGTGTCAGGGGGCGTGGTTTCTCACACCACCGCTGGC  
1D GCAGGGGTTGATGCCAGCACTCGTGTGTCAGGGGGCGTGGTTTCTCACACCACCGCTGGC  
8E GCAGGGGTTGATGCCAGCACTCGTGTGTCAGGGGGCGTGGTTTCTCACACCACCGCTGGC  
9A GCAGGGGTTGACGCCAGCACTCGTGTGTCAGGGGGCGTGGTTTCTCACACCACCGCTGGC  
10D GCAGGGGTTGACGCCAGCACTCGTGTGTCAGGGGGCGTGGTTTCTCACACCACCGCTGGC  
3D GCAGGGGTTGACGCCAGCACTCGTGTGTCAGGGGGCGTGGTTTCTCACACCACCGCTGGC  
4D GCAGGGGTTGACGCCAGCACTCGTGTGTCAGGGGGCGTGGTTTCTCACACCACCGCTGGC  
5D GCAGGGGTTGACGCCAGCACTCGTGTGTCAGGGGGCGTGGTTTCTCACACCACCGCTGGC  
10B GCAGGGGTTGACGCCAGCACTCGTGTGTCAGGGGGCGTGGTTTCTCACACCACCGCTGGC  
5E GCAGGGGTTGACGCCAGCACTCGTGTGTCAGGGGGCGTGGTTTCTCACACCACCGCTGGC  
1E GCAGGGGTTGACGCCAGCACTCGTGTGTCAGGGGGCGTGGTTTCTCACACCACCGCTGGC  
7D GCAGGGGTTGACGCCAGCACTCGTGTGTCAGGGGGCGTGGTTTCTCACACCACCGCTGGC  
2D GCAGGGGTTGACGCCAGCACTCGTGTGTCAGGGGGCGTGGTTTCTCACACCACCGCTGGC

2E GCAGGGGTTGACGCCAGCACTCGTGTGTCAGGGGGCGTGGTTTCTCACACCACCGCTGGC  
6E GCAGGGGTTGACGCCAGCACTCGTGTGTCAGGGGGCGTGGTTTCTCACACCACCGCTGGC  
2B GCAGGGGTAGACGCCGAAACTCATGTGTCAGGGGGTGTGGTTTCTCACAGCACCTCTGGG  
3B GCAGGGGTAGACGCCACACTCATGTGTCAGGGGGTGTGGTTTCTCACAGCACCTATGGG  
6D GCAGGGGTAGACGCCACACTCATGTGTCAGGTGGTGTGGTTTCTCACAGCACCTATGGG  
9C GCAGGGGTAGACGCCACACTCCTGTGTCAGGGGGTGTGGTTTCTCACACCACCTATGGG  
2C GCAGGGGTAGACGCCACACTCATGTGTCAGGTGGTGTGGTTTCTCACAGCACCTATGGG  
5A GCAGGGGTAGACGCCACACTCATGTGTCAGGGGGTGTGGTTTCTCACAGCACCAATGGG  
8A GCAGGGGTAGACGCCACACTCATGTGTCAGGTGGTGTGGTTTCTCACAGCACCTATGGG  
3E GCAGGGGTAGACGCCACACTCATGTGTCAGGTGGTGTGGTTTCTCACAGCACCTATGGG  
4E GCAGGGGTAGACGCCACACTCATGTGTCAGGTGGTGTGGTTTCTCACAGCACCTATGGG  
10A GCAGGGGTAGACGCCACACTCATGTGTCAGGTGGTGTGGTTTCTCACAGCACCTATGGG  
7B GCAGGGGTAGACGCCACACTCGTGTGTCAGGTGGTGTGGTTTCTCACAGCACCTATGGG  
6C GCAGGGGTAGACGCCACGCTCATGTGTCAGGTGGTGTGGTTTCTCACAGCACCTATGGG  
8C GCAGGGGTAGACGCCACGCTCATGTGTCAGGTGGTGTGGTTTCTCACAGCACCTATGGG  
1C GCAGGGGTAGACGCCACGCTCATGTGTCAGGTGGTGTGGTTTCTCACAGCACCTATGGG  
4C GCAGGGGTAGACGCCACGCTCATGTGTCAGGTGGTGTGGTTTCTCACAGCACCTATGGG  
7C GCAGGGGTAGACGCCACGCTCATGTGTCAGGTGGTGTGGTTTCTCACAGCACCTATGGG  
10C GCAGGGGTAGACGCCACGCTCATGTGTCAGGTGGTGTGGTTTCTCACAGCACCTATGGG  
5C GCAGGGGTAGACGCCACGCTCATGTGTCAGGTGGTGTGGTTTCTCACAGCACCTATGGG  
3C GCAGGGGTAGACGCCACGCTCATGTGTCAGGTGGTGTGGTTTCTCACAGCACCTATGGG  
\*\*\*\*\* \*\* \*\*\* \*\*\* \*\*\*\*\* \*\* \*\*\*\*\* \*\*

7A CTTGCCGACTTCTGTCCCTGGACCAAGCAGAATCTACATCTCATCAACAGCAATGGG  
6B CTTGCCGACTTCTGTCCCTGGACCAAGCAGAATCTACATCTCATCAACAGCAATGGG  
9D CTTGCCGACTTCTGTCCCTGGACCAAGCAGAATCTACATCTCATCAACAGCAATGGG  
1D CTTGCCGACTTCTGTCCCTGGACCAAGCAGAATCTACATCTCATCAACAGCAATGGG  
8E CTTGCCGACTTCTGTCCCTGGACCAAGCAGAATCTACATCTCATCAACAGCAATGGG  
9A CTTGCCGACTTCTGTCCCTGGACCAAGCAGAATCTACATCTCATCAACAGCAATGGG  
10D CTTGCCGACTTCTTTCCCTGGACCAAGCAGAATCTACATCTCATCAACAGCAACGGG  
3D CTTGCCGACTTCTTTCCCTGGACCAAGCAGAATCTACATCTCATCAACAGCAACGGG  
4D CTTGCCGACTTCTTTCCCTGGACCAAGCAGAATCTACATCTCATCAACAGCAACGGG  
5D CTTGCCGACTTCTTTCCCTGGACCAAGCAGAATCTACATCTCATCAACAGCAACGGG  
10B CTTGCCGACTTCTTTCCCTGGACCAAGCAGAATCTACATCTCATCAACAGCAACGGG  
5E CTTGCCGACTTCTTTCCCTGGACCAAGCAGAATCTACATCTCATCAACAGCAACGGG  
1E CTTGCCGACTTCTTTCCCTGGACCAAGCAGAATCTACATCTCATCAACAGCAACGGG  
7D CTTGCCGACTTCTTTCCCTGGACCAAGCAGAATCTACATCTCATCAACAGCAACGGG  
2D CTTGCCGACTTCTTTCCCTGGACCAAGCAGAATCTACATCTCATCAACAGCAACGGG  
2E CTTGCCGACTTCTTTCCCTGGACCAAGCAGAATCTACATCTCATCAACAGCAACGGG  
6E CTTGCCGACTTCTTTCCCTGGACCAAGCAGAATCTACATCTCATCAACAGCAACGGG  
2B CTTGCCGACTTCTTACCCTGGACCCAGCCAGAACTACATCTCATCAACAGCAACGGG  
3B TTTGCCAGCCTTCTTACCCTGGACCCAGCCAGAAGCTACATCTCATCAACAGCAACGGG  
6D TTTGCCAGCCTTCTTACCCTGGACCCAGCCAGAAGCTACATCTCATCAACAGCAACGGG  
9C TTTGCCAGCCTTCTTACCCTGGACCCAGCCAGAAGCTACATCTCATCAACAGCAACGGG  
2C TTTGCCAGCCTTCTTACCCTGGACCCAGCCAGAAGCTACATCTCATCAACAGCAACGGG  
5A TTTGCCAGCCTTCTTACCCTGGACCCAGCCAGAAGCTACATCTCATCAACAGCAACGGG  
8A TTTGCCAGCCTTCTTACCCTGGACCCAGCCAGAAGCTACATCTCATCAACAGCAATGGG  
3E TTTGCCAGCCTTCTTACCCTGGACCCAGCCAGAAGCTACATCTCATCAACAGCAACGGG  
4E TTTGCCAGCCTTCTTACCCTGGACCCAGCCAGAAGCTACATCTCATCAACAGCAACGGG  
10A TTTGCCAGCCTTCTTACCCTGGACCCAGCCAGAAGCTACATCTCATCAACAGCAACGGG  
7B TTTGCCAGCCTTCTTACCCTGGACCCAGCCAGAAGCTACATCTCATCAACAGCAACGGG  
6C TTTGCCAGCCTTCTTACCCTGGACCCAGCCAGAAGCTACATCTCATCAACAGCAACGGG  
8C TTTGCCAGCCTTCTTACCCTGGACCCAGCCAGAAGCTACATCTCATCAACAGCAACGGG  
1C TTTGCCAGCCTTCTTACCCTGGACCCAGCCAGAAGCTACATCTCATCAACAGCAACGGG  
4C TTTGCCAGCCTTCTTACCCTGGACCCAGCCAGAAGCTACATCTCATCAACAGCAACGGG  
7C TTTGCCAGCCTTCTTACCCTGGACCCAGCCAGAAGCTACATCTCATCAACAGCAACGGG  
10C TTTGCCAGCCTTCTTACCCTGGACCCAGCCAGAAGCTACATCTCATCAACAGCAACGGG



5C TTTGCCAGCCTTCTTACCCCTGGACCCAGCCAGAAGCTACATCTCATCAACAGCAACGGG  
3C TTTGCCAGCCTTCTTACCCCTGGACCCAGCCAGAAGCTACATCTCATCAACAGCAACGGG  
\*\*\*\*\* \*\*

7A AGCTGGCATATAAACAGGACTGCCCTCAATTGCAATGACAGCTTAAACACTGGGTTCTTA  
6B AGCTGGCATATAAACAGGACTGCCCTCAATTGCAATGACAGCTTAAACACTGGGTTCTTA  
9D AGCTGGCATATAAACAGGACTGCCCTCAATTGCAATGACAGCTTAAACACTGGGTTCTTA  
1D AGCTGGCATATAAACAGGACTGCCCTCAATTGCAATGACAGCTTAAACACTGGGTTCTTA  
8E AGCTGGCATATAAACAGGACTGCCCTCAATTGCAATGACAGCTTAAACACTGGGTTCTTA  
9A AGCTGGCATATAAACAGGACTGCCCTCAATTGCAATGACAGCTTAAACACTGGGTTCTTA  
10D AGCTGGCATATAAACAGGACTGCCCTCAATTGCAATGACAGCTTAAACACTGGGTTCTTA  
3D AGCTGGCATATAAACAGGACTGCCCTCAATTGCAATGACAGCTTAAACACTGGGTTCTTA  
4D AGCTGGCATATAAACAGGACTGCCCTCAATTGCAATGACAGCTTAAACACTGGGTTCTTA  
5D AGCTGGCATATAAACAGGACTGCCCTCAATTGCAATGACAGCTTAAACACTGGGTTCTTA  
10B AGCTGGCATATAAACAGGACTGCCCTCAATTGCAATGACAGCTTAAACACTGGGTTCTTA  
5E AGCTGGCATATAAACAGGACTGCCCTCAATTGCAATGACAGCTTAAACACTGGGTTCTTA  
1E AGCTGGCATATAAACAGGACTGCCCTCAATTGCAATGACAGCTTAAACACTGGGTTCTTA  
7D AGCTGGCATATAAACAGGACTGCCCTCAATTGCAATGACAGCTTAAACACTGGGTTCTTA  
2D AGCTGGCATATAAACAGGACTGCCCTCAATTGCAATGACAGCTTAAACACTGGGTTCTTA  
2E AGCTGGCATATAAACAGGACTGCCCTCAATTGCAATGACAGCTTAAACACTGGGTTCTTA  
6E AGCTGGCATATAAACAGGACTGCCCTCAATTGCAATGACAGCTTAAACACTGGGTTCTTA  
2B AGCTGGCATATAAACAGGACTGCCCTCAATTGCAATGACAGCTTAAACACTGGGTTCTTA  
3B AGCTGGCATATAAATAGGACTGCCCTCAACTGCAATGACAGCTTAAACACTGGGTTCTTA  
6D AGCTGGCATATAAATAGGACTGCCCTCAATTGCAATGACAGCTTAAACACTGGGTTCTTA  
9C AGCTGGCATATAAATAGGACTGCCCTCAATTGCAATGACAGCTTAAACACTGGGTTCTTA  
2C AGCTGGCATATAAATAGGACTGCCCTCAATTGCAATGACAGCTTAAACACTGGGTTCTTA  
5A AGCTGGCATATAAATAGGACTGCCCTCAACTGCAATGACAGCTTAAACACTGGGTTCTTA  
8A AGCTGGCATATAAATAGGACTGCCCTCAATTGCAATGACAGCTTAAACACTGGGTTCTTA  
3E AGCTGGCATATAAATAGGACTGCCCTCAATTGCAATGACAGCTTAAACACTGGGTTCTTA  
4E AGCTGGCATATAAATAGGACTGCCCTCAATTGCAATGACAGCTTAAACACTGGGTTCTTA  
10A AGCTGGCATATAAATAGGACTGCCCTCAATTGCAATGACAGCTTAAACACTGGGTTCTTA  
7B AGCTGGCATATAAATAGGACTGCCCTCAATTGCAATGACAGCTTAAACACTGGGTTCTTA  
6C AGCTGGCATATAAATAGGACTGCCCTCAATTGCAATGACAGCTTAAACACTGGGTTCTTA  
8C AGCTGGCATATAAATAGGACTGCCCTCAATTGCAATGACAGCTTAAACACTGGGTTCTTA  
1C AGCTGGCATATAAATAGGACTGCCCTCAATTGCAATGACAGCTTAAACACTGGGTTCTTA  
4C AGCTGGCATATAAATAGGACTGCCCTCAATTGCAATGACAGCTTAAACACTGGGTTCTTA  
7C AGCTGGCATATAAATAGGACTGCCCTCAATTGCAATGACAGCTTAAACACTGGGTTCTTA  
10C AGCTGGCATATAAATAGGACTGCCCTCAATTGCAATGACAGCTTAAACACTGGGTTCTTA  
5C AGCTGGCATATAAATAGGACTGCCCTCAATTGCAATGACAGCTTAAACACTGGGTTCTTA  
3C AGCTGGCATATAAATAGGACTGCCCTCAATTGCAATGACAGCTTAAACACTGGGTTCTTA  
\*\*\*\*\*

7A GCTAGCTTGTTCTACGCTCACAAGTTTAAACAGCTCAGGGTGTCCCGAACGGCTAGCATCA  
6B GCTAGCTTGTTCTACGCTCACAAGTTTAAACAGCTCAGGGTGTCCCGAACGGCTAGCATCA  
9D GCTAGCTTGTTCTACGCTCACAAGTTTAAACAGCTCAGGGTGTCCCGAACGGCTAGCATCA  
1D GCTAGCTTGTTCTACGCTCACAAGTTTAAACAGCTCAGGGTGTCCCGAACGGCTAGCATCA  
8E GCTAGCTTGTTCTACGCTCACAAGTTTAAACAGCTCAGGGTGTCCCGAACGGCTAGCATCA  
9A GCTAGCTTGTTCTACGCTCACAAGTTTAAACAGCTCAGGGTGTCCCGAACGGCTAGCATCA  
10D GCTAGCTTGTTCTACGCTCACAAGTTTAAACAGCTCAGGGTGTCCCGAACGGCTAGCATCA  
3D GCTAGCTTGTTCTACGCTCACAGGTTTAAACAGCTCAGGGTGTCCCGAACGGCTAGCACCA  
4D GCTAGCTTGTTCTACGCTCACAGGTTTAAACAGCTCAGGGTGTCCCGAACGGCTAGCACCA  
5D GCTAGCTTGTTCTACGCTCACAGGTTTAAACAGCTCAGGGTGTCCCGAACGGCTAGCACCA  
10B GCTAGCTTGTTCTACGCTCACAGGTTTAAACAGCTCAGGGTGTCCCGAACGGCTAGCACCA  
5E GCTAGCTTGTTCTACGCTCACAGGTTTAAACAGCTCAGGGTGTCCCGAACGGCTAGCACCA  
1E GCTAGCTTGTTCTACGCTCACAGGTTTAAACAGCTCAGGGTGTCCCGAACGGCTAGCACCA  
7D GCTAGCTTGTTCTACGCTCACAGGTTTAAACAGCTCAGGGTGTCCCGAACGGCTAGCACCA  
2D GCTAGCTTGTTCTACGCTCACAGGTTTAAACAGCTCAGGGTGTCCCGAACGGCTAGCACCA

2E GCTAGCTTGTTCTACGCTCACAGGTTTAAACAGCTCAGGGTGTCCCGAACGGCTAGCACCA  
6E GCTAGCTTGTTCTACGCTCACAGGTTTAAACAGCTCAGGGTGTCCCGAACGGCTAGCACCA  
2B GCTAGCTTGTTCTACACTCACAAAGTTTAAACAGCTCAGGGTGTCCCGAACGGCTAGCATCA  
3B GCTAGCTTGTTCTACGCTCATAAGTTTAAACAGCTCAGGGTGTCCCGAACGGCTAGCATCA  
6D GCTAGCTTGTTCTACGCTCATAAGTTTAAACAGCTCAGGGTGTCCCGAACGGCTAGCATCT  
9C GCTAGCCTGTTCTACGCTCATAAGTTTAAACAGCTCAGGGTGTCCCGAACGGCTAGCATCA  
2C GCTAGCCTGTTCTACGCTCATAAGTTTAAACAGCTCAGGGTGTCCCGAACGGCTAGCATCA  
5A GCTAGCTTGTTCTACGCTCATAAGTTTAAACAGCTCAGGGTGTCCCGAACGGCTAGCATCA  
8A GCTAGCTTGTTCTACGCTCATAAGTTTAAACAGCTCAGGGTGTCCCGAACGGCTAGCATCA  
3E GCTAGCTTGTTCTACGCTCATAAGTTTAAACAGCTCAGGGTGTCCCGAACGGCTAGCATCT  
4E GCTAGCTTGTTCTACGCTCATAAGTTTAAACAGCTCAGGGTGTCCCGAACGGCTAGCATCT  
10A GCTAGCTTGTTCTACGCTCATAAGTTTAAACAGCTCAGGGTGTCCCGAACGGCTAGCATCA  
7B GCTAGCTTGTTCTACGCTCATAAGTTTAAACAGCTCAGGGTGTCCCGAACGGCTAGCATCA  
6C GCTAGCTTGTTCTACGCTCATAAGTTTAAACAGCTCAGGGTGTCCCGAACGGCTAGCATCA  
8C GCTAGCTTGTTCTACGCTCATAAGTTTAAACAGCTCAGGGTGTCCCGAACGGCTAGCATCA  
1C GCTAGCTTGTTCTACGCTCATAAGTTTAAACAGCTCAGGGTGTCCCGAACGGCTAGCATCA  
4C GCTAGCTTGTTCTACGCTCATAAGTTTAAACAGCTCAGGGTGTCCCGAACGGCTAGCATCA  
7C GCTAGCTTGTTCTACGCTCATAAGTTTAAACAGCTCAGGGTGTCCCGAACGGCTAGCATCA  
10C GCTAGCTTGTTCTACGCTCATAAGTTTAAACAGCTCAGGGTGTCCCGAACGGCTAGCATCA  
5C GCTAGCTTGTTCTACGCTCATAAGTTTAAACAGCTCAGGGTGTCCCGAACGGCTAGCATCA  
3C GCTAGCTTGTTCTACGCTCATAAGTTTAAACAGCTCAGGGTGTCCCGAACGGCTAGCATCA

\*\*\*\*\* \*\*\*\*\* \*\*\*\*\* \* \*\*\*\*\*

7A TGCAAAAGCCTTGACAGTTTTCCCAAGGCTGGGGCCACTTGGGGTTCGTAACATCAGC  
6B TGCAAAAGCCTTGACAGTTTTCCCAAGGCTGGGGCCACTTGGGGTTCGTAACATCAGC  
9D TGCAAAAGCCTTGACAGTTTTGCCCAAGGCTGGGGCCACTTGGGGTTCGTAACATCAGC  
1D TGCAAAAGCCTTGACAGTTTTCCCAAGGCTGGGGCCACTTGGGGTTCGTAACATCAGC  
8E TGCAAAAGCCTTGACAGTTTTCCCAAGGCTGGGGCCACTTGGGGTTCGTAACATCAGC  
9A TGCAAAAGCCTTGACAGTTTTGACCAAGGCTGGGGCCACTTGGGGTTCGTAACATCAGC  
10D TGCCGAAGCCTTGACAGTTTTGACCAAGGCTGGGGCCACTTGGGGTTCGTAACATCAGC  
3D TGCCGAAGCCTTGACAGTTTTGACCAAGGCTGGGGCCACTTGGGGTTCGTAACATCAGC  
4D TGCCGAAGCCTTGACAGTTTTGACCAAGGCTGGGGCCACTTGGGGTTCGTAACATCAGC  
5D TGCCGAAGCCTTGACAGTTTTGACCAAGGCTGGGGCCACTTGGGGTTCGTAACATCAGC  
10B TGCCGAAGCCTTGACAGTTTTGACCAAGGCTGGGGCCACTTGGGGTTCGTAACATCAGC  
5E TGCCGAAGCCTTGACAGTTTTGACCAAGGCTGGGGCCACTTGGGGTTCGTAACATCAGC  
1E TGCCGAAGCCTTGACAGTTTTGACCAAGGCTGGGGCCACTTGGGGTTCGTAACATCAGC  
7D TGCCGAAGCCTTGACAGTTTTGACCAAGGCTGGGGCCACTTGGGGTTCGTAACATCAGC  
2D TGCCGAAGCCTTGACAGTTTTGACCAAGGCTGGGGCCACTTGGGGTTCGTAACATCAGC  
2E TGCCGAAGCCTTGACAGTTTTGACCAAGGCTGGGGCCACTTGGGGTTCGTAACATCAGC  
6E TGCCGAAGCCTTGACAGTTTTGACCAAGGCTGGGGCCACTTGGGGTTCGTAACATCAGC  
2B TGCAAGAGCCTTGACAGTTTTGACCAAGGCTGGGGCCACTTGGGGTTCGTAACATCAGC  
3B TGCAAGAGCCTTGACAGTTTTGACCAAGGCTGGGGCCACTTGGGGTTCGTAACATCAGC  
6D TGCAAGAGCCTTGACAGTTTTGACCAAGGCTGGGGCCACTTGGGGTTCGTAACATCAGC  
9C TGCAAGAGCCTTGACAGTTTTGACCAAGGCTGGGGCCACTTGGGGTTCGTAACATCAGC  
2C TGCAAGAGCCTTGACAGTTTTGACCAAGGCTGGGGCCACTTGGGGTTCGTAACATCAGC  
5A TGCAAGAGCCTTGACAGTTTTGACCAAGGCTGGGGCCACTTGGGGTTCGTAACATCAGC  
8A TGCAAGAGCCTTGACAGTTTTGACCAAGGCTGGGGCCACTTGGGGTTCGTAACATCAGC  
3E TGCAAGAGCCTTGACAGTTTTGACCAAGGCTGGGGCCACTTGGGGTTCGTAACATCAGC  
4E TGCAAGAGCCTTGACAGTTTTGACCAAGGCTGGGGCCACTTGGGGTTCGTAACATCAGC  
10A TGCAAGAGCCTTGACAGTTTTGACCAAGGCTGGGGCCACTTGGGGTTCGTAACATCAGC  
7B TGCAAGAGCCTTGACAGTTTTGACCAAGGCTGGGGCCACTTGGGGTTCGTAACATCAGC  
6C TGCAAGAGCCTTGACAGTTTTGACCAAGGCTGGGGCCACTTGGGGTTCGTAACATCAGC  
8C TGCAAGAGCCTTGACAGTTTTGACCAAGGCTGGGGCCACTTGGGGTTCGTAACATCAGC  
1C TGCAAGAGCCTTGACAGTTTTGACCAAGGCTGGGGCCACTTGGGGTTCGTAACATCAGC  
4C TGCAAGAGCCTTGACAGTTTTGACCAAGGCTGGGGCCACTTGGGGTTCGTAACATCAGC  
7C TGCAAGAGCCTTGACAGTTTTGACCAAGGCTGGGGCCACTTGGGGTTCGTAACATCAGC  
10C TGCAAGAGCCTTGACAGTTTTGACCAAGGCTGGGGCCACTTGGGGTTCGTAACATCAGC

5C TGCAAGAGCCTTGACAGTTTTGACCAAGGCTGGGGCCCACTTGGGGTCGCTAACATCAGC  
3C TGCAAGAGCCTTGACAGTTTTGACCAAGGCTGGGGCCCACTTGGGGTCGCTAACATCAGC  
\*\*\* \*\*\*\*\*

7A GGCCCATCTGATGACAGGCCTTATTGCTGGCACTACGCGCCCCGGCCGTGTGCGATTGTG  
6B GGCCCATCTGATGACAGGCCTTATTGCTGGCACTACGCGCCCCGGCCGTGTGCGATTGTG  
9D GGCCCATCTGATGACAGGCCTTACTGCTGGCACTACGCGCCCCGGCCGTGTGCGATTGTG  
1D GGCCCATCTGAAGACAGGCCTTATTGCTGGCACTACGCGCCCCGGCCGTGTGCGATTGTG  
8E GGCCCATCTGATGACAGGCCTTATTGCTGGCACTACGCGCCCCGGCCGTGTGCGATTGTG  
9A GGCCCATCTGATGACAGGCCTTATTGCTGGCACTACGCGCCTCGGCCGTGTGCGATTGAG  
10D GGCCCATCTGATGACAGGCCTTATTGCTGGCACTACGCGCCCCGGCCGTGTGCGATTGTG  
3D GGCCCATCTGATGACAGGCCTTATTGCTGGCACTACGCGCCTCGGCCGTGTGCGATTGAG  
4D GGCCCATCTGATGACAGGCCTTATTGCTGGCACTACGCGCCTCGGCCGTGTGCGATTGAG  
5D GGCCCATCTGATGACAGGCCTTATTGCTGGCACTACGCGCCTCGGCCGTGTGCGATTGAG  
10B GGCCCATCTGATGACAGGCCTTATTGCTGGCACTACGCGCCTCGGCCGTGTGCGATTGAG  
5E GGCCCATCTGATGACAGGCCTTATTGCTGGCACTACGCGCCTCGGCCGTGTGCGATTGAG  
1E GGCCCATCTGATGACAGGCCTTATTGCTGGCACTACGCGCCTCGGCCGTGTGCGATTGAG  
7D GGCCCATCTGATGACAGGCCTTATTGCTGGCACTACGCGCCTCGGCCGTGTGCGATTGAG  
2D GGCCCATCTGATGACAGGCCTTATTGCTGGCACTACGCGCCTCGGCCGTGTGCGATTGAG  
2E GGCCCATCTGATGACAGGCCTTATTGCTGGCACTACGCGCCTCGGCCGTGTGCGATTGAG  
6E GGCCCATCTGATGACAGGCCTTATTGCTGGCACTACGCGCCTCGGCCGTGTGCGATTGAG  
2B GGCCCATCTGATGACAGGCCTTATTGCTGGCACTACGCGCCTCGGCCGTGTGCGATTGAG  
3B GGCCCATCTGAAGACAGGCCTTATTGCTGGCACTACGCGCCCCGGCCGTGTGCGATTGAG  
6D GGCCCATCTGATGACAGGCCTTATTGCTGGCACTACGCGCCTCGGCCGTGTGCGATTGAG  
9C GGCCCATCTGATGACAGGCCTTATTGCTGGCACTACGCGCCTCGGCCGTGTGCGATTGAG  
2C GGCCCATCTGATGACAGGCCTTATTGCTGGCACTACGCGCCTCGGCCGTGTGCGATTGAG  
5A GGCCCATCTGATGACAGGCCTTATTGCTGGCACTACGCGCCTCGGCCGTGTGCGATTGAG  
8A GGCCCATCTGATGACAGGCCTTATTGCTGGCACTACGCGCCTCGGCCGTGTGCGATTGAG  
3E GGCCCATCTGATGACAGGCCTTATTGCTGGCACTACGCGCCTCGGCCGTGTGCGATTGAG  
4E GGCCCATCTGATGACAGGCCTTATTGCTGGCACTACGCGCCTCGGCCGTGTGCGATTGAG  
10A GGCCCATCTGATGACAGGCCTTATTGCTGGCACTACGCGCCTCGGCCGTGTGCGATTGAG  
7B GGCCCATCTGATGACAGGCCTTATTGCTGGCACTACGCGCCTCGGCCGTGTGCGATTGAG  
6C GGCCCATCTGATGACAGGCCTTATTGCTGGCACTACGCGCCTCGGCCGTGTGCGATTGAG  
8C GGCCCATCTGATGACAGGCCTTATTGCTGGCACTACGCGCCTCGGCCGTGTGCGATTGAG  
1C GGCCCATCTGATGACAGGCCTTATTGCTGGCACTACGCGCCTCGGCCGTGTGCGATTGAG  
4C GGCCCATCTGATGACAGGCCTTATTGCTGGCACTACGCGCCTCGGCCGTGTGCGATTGAG  
7C GGCCCATCTGATGACAGGCCTTATTGCTGGCACTACGCGCCTCGGCCGTGTGCGATTGAG  
10C GGCCCATCTGATGACAGGCCTTATTGCTGGCACTACGCGCCTCGGCCGTGTGCGATTGAG  
5C GGCCCATCTGATGACAGGCCTTATTGCTGGCACTACGCGCCTCGGCCGTGTGCGATTGAG  
3C GGCCCATCTGATGACAGGCCTTATTGCTGGCACTACGCGCCTCGGCCGTGTGCGATTGAG  
\*\*\*\*\* \*\*\*\*\* \*\*\*\*\* \*\*\*\*\* \*

7A CCGGCGGCCAGAGTGTGTGGTCCCTGTGTACTGCTTTACTCCCAGCCCCGTGCTAGTCGGA  
6B CCGGCGGCCAGAGTGTGTGGTCCCTGTGTACTGCTTTACTCCCAGCCCCGTGCTAGTCGGA  
9D CCGGCGGCCAGAGTGTGTGGTCCCTGTGTACTGCTTTACTCCCAGCCCCGTGCTAGTCGGA  
1D CCGGCGGCCAGAGTGTGTGGTCCCTGTGTACTGCTTTACTCCCAGCCCCGTGCTAGTCGGA  
8E CCGGCGGCCAGAGTGTGTGGTCCCTGTGTACTGCTTTACTCCCAGCCCCGTGCTAGTCGGA  
9A CCGGCAGCCAGAGTGTGTGGTCCCCTGTGTACTGCTTTACTCCCAGCCCCGTGCTAGTCGGA  
10D CCGGCGGCCAGAGTGTGTGGTCCCTGTGTACTGCTTTACTCCCAGCCCCGTGCTAGTCGGA  
3D CCGGCAGCCAGAGTGTGTGGTCCCCTGTGTACTGCTTTACTCCCAGCCCCGTGCTAGTCGGA  
4D CCGGCAGCCAGAGTGTGTGGTCCCCTGTGTACTGCTTTACTCCCAGCCCCGTGCTAGTCGGA  
5D CCGGCAGCCAGAGTGTGTGGTCCCCTGTGTACTGCTTTACTCCCAGCCCCGTGCTAGTCGGA  
10B CCGGCAGCCAGAGTGTGTGGTCCCCTGTGTACTGCTTTACTCCCAGCCCCGTGCTAGTCGGA  
5E CCGGCAGCCAGAGTGTGTGGTCCCCTGTGTACTGCTTTACTCCCAGCCCCGTGCTAGTCGGA  
1E CCGGCAGCCAGAGTGTGTGGTCCCCTGTGTACTGCTTTACTCCCAGCCCCGTGCTAGTCGGA  
7D CCGGCAGCCAGAGTGTGTGGTCCCCTGTGTACTGCTTTACTCCCAGCCCCGTGCTAGTCGGA  
2D CCGGCAGCCAGAGTGTGTGGTCCCCTGTGTACTGCTTTACTCCCAGCCCCGTGCTAGTCGGA

2E CCGGCAGCCAGAGTGTGTGGTCCCCTGTACTGCTTTACTCCCAGCCCCGTCGTAGTCGGA  
6E CCGGCAGCCAGAGTGTGTGGTCCCCTGTACTGCTTTACTCCCAGCCCCGTCGTAGTCGGA  
2B CCGGCAGCCAGAGTGTGTGGTCCCCTGTACTGCTTTACTCCCAGCCCCGTCGTAGTCGGA  
3B CCGGCAGCCAGAGTGTGTGGTCCCCTGTACTGCTTTACTCCCAGCCCCGTCGTAGTCGGA  
6D CCGGCAGCCAGAGTGTGTGGTCCCCTGTACTGCTTTACTCCCAGCCCCGTCGTAGTCGGA  
9C CCGGCAGCCAGAGTGTGTGGTCCCCTGTACTGCTTTACTCCCAGCCCCGTCGTAGTCGGA  
2C CCGGCAGCCAGAGTGTGTGGTCCCCTGTACTGCTTTACTCCCAGCCCCGTCGTAGTCGGA  
5A CCGGCAGCCAGAGTGTGTGGTCCCCTGTACTGCTTTACTCCCAGCCCCGTCGTAGTCGGA  
8A CCGGCAGCCAGAGTGTGTGGTCCCCTGTACTGCTTTACTCCCAGCCCCGTCGTAGTCGGA  
3E CCGGCAGCCAGAGTGTGTGGTCCCCTGTACTGCTTTACTCCCAGCCCCGTCGTAGTCGGA  
4E CCGGCAGCCAGAGTGTGTGGTCCCCTGTACTGCTTTACTCCCAGCCCCGTCGTAGTCGGA  
10A CCGGCAGCCAGAGTGTGTGGTCCCCTGTACTGCTTTACTCCCAGCCCCGTCGTAGTCGGA  
7B CCGGCAGCCAGAGTGTGTGGTCCCCTGTACTGCTTTACTCCCAGCCCCGTCGTAGTCGGA  
6C CCGGCAGCCAGAGTGTGTGGTCCCCTGTACTGCTTTACTCCCAGCCCCGTCGTAGTCGGA  
8C CCGGCAGCCAGAGTGTGTGGTCCCCTGTACTGCTTTACTCCCAGCCCCGTCGTAGTCGGA  
1C CCGGCAGCCAGAGTGTGTGGTCCCCTGTACTGCTTTACTCCCAGCCCCGTCGTAGTCGGA  
4C CCGGCAGCCAGAGTGTGTGGTCCCCTGTACTGCTTTACTCCCAGCCCCGTCGTAGTCGGA  
7C CCGGCAGCCAGAGTGTGTGGTCCCCTGTACTGCTTTACTCCCAGCCCCGTCGTAGTCGGA  
10C CCGGCAGCCAGAGTGTGTGGTCCCCTGTACTGCTTTACTCCCAGCCCCGTCGTAGTCGGA  
5C CCGGCAGCCAGAGTGTGTGGTCCCCTGTACTGCTTTACTCCCAGCCCCGTCGTAGTCGGA  
3C CCGGCAGCCAGAGTGTGTGGTCCCCTGTACTGCTTTACTCCCAGCCCCGTCGTAGTCGGA  
\*\*\*\*\*

7A ACCACTGACCGTCTCGGGGTCCCTACTTACACCTGGGGGGAGAATGAGTCTGATGTCTTT  
6B ACCACTGACCGTCTCGGGGTCCCTACTTACACCTGGGGGGAGAATGAGTCTGATGTCTTC  
9D ACCACTGACCGTCTCGGGGTCCCTACTTACACCTGGGGGGAGAATGAGTCTGATGTCTTT  
1D ACCACTGACCGTCTCGGGGTCCCTACTTACACCTGGGGGGAGAATGAGTCTGATGTCTTT  
8E ACCACTGACCGTCTCGGGGTCCCTACTTACACCTGGGGGGAGAATGAGTCTGATGTCTTT  
9A ACCACTGACCGTCTCGGGGTCCCTACTTACACTTGGGGGGAGAATGAGTCTGATGTCTTT  
10D ACCACTGACCGTCTCGGGGTCCCTACTTACACTTGGGGGGAGAATGAGTCTGATGTCTTT  
3D ACCACTGACCGTCTCGGGGTCCCTACTTACACTTGGGGGGAGAATGAGTCTGATGTCTTT  
4D ACCACTGACCGTCTCGGGGTCCCTACTTACACTTGGGGGGAGAATGAGTCTGATGTCTTT  
5D ACCACTGACCGTCTCGGGGTCCCTACTTACACTTGGGGGGAGAATGAGTCTGATGTCTTT  
10B ACCACTGACCGTCTCGGGGTCCCTACTTACACTTGGGGGGAGAATGAGTCTGATGTCTTT  
5E ACCACTGACCGTCTCGGGGTCCCTACTTACACTTGGGGGGAGAATGAGTCTGATGTCTTT  
1E ACCACTGACCGTCTCGGGGTCCCTACTTACACTTGGGGGGAGAATGAGTCTGATGTCTTT  
7D ACCACTGACCGTCTCGGGGTCCCTACTTACACTTGGGGGGAGAATGAGTCTGATGTCTTT  
2D ACCACTGACCGTCTCGGGGTCCCTACTTACACTTGGGGGGAGAATGAGTCTGATGTCTTT  
2E ACCACTGACCGTCTCGGGGTCCCTACTTACACTTGGGGGGAGAATGAGTCTGATGTCTTT  
6E ACCACTGACCGTCTCGGGGTCCCTACTTACACTTGGGGGGAGAATGAGTCTGATGTCTTT  
2B ACCACTGACCGTCTCGGGGTCCCTACTTACACTTGGGGGGAGAATGAGTCTGATGTCTTT  
3B ACCACTGACCGTCTCGGGGTCCCTACTTACACTTGGGGGGAGAATGAGTCTGATGTCTTT  
6D ACCACTGACCGTCTCGGGGTCCCTACTTACACTTGGGGGGAGAATGAGTCTGATGTCTTT  
9C ACCACTGACCGTCTCGGGGTCCCTACTTACACTTGGGGGGAGAATGAGTCTGATGTCTTT  
2C ACCACTGACCGTCTCGGGGTCCCTACTTACACTTGGGGGGAGAATGAGTCTGATGTCTTT  
5A ACCACTGACCGTCTCGGGGTCCCTACTTACACTTGGGGGGAGAATGAGTCTGATGTCTTT  
8A ACCACTGACCGTCTCGGGGTCCCTACTTACACTTGGGGGGAGAATGAGTCTGATGTCTTT  
3E ACCACTGACCGTCTCGGGGTCCCTACTTACACTTGGGGGGAGAATGAGTCTGATGTCTTT  
4E ACCACTGACCGTCTCGGGGTCCCTACTTACACTTGGGGGGAGAATGAGTCTGATGTCTTT  
10A ACCACTGACCGTCTCGGGGTCCCTACTTACACTTGGGGGGAGAATGAGTCTGATGTCTTT  
7B ACCACTGACCGTCTCGGGGTCCCTACTTACACTTGGGGGGAGAATGAGTCTGATGTCTTT  
6C ACCACTGACCGTCTCGGGGTCCCTACTTACACTTGGGGGGAGAATGAGTCTGATGTCTTT  
8C ACCACTGACCGTCTCGGGGTCCCTACTTACACTTGGGGGGAGAATGAGTCTGATGTCTTT  
1C ACCACTGACCGTCTCGGGGTCCCTACTTACACTTGGGGGGAGAATGAGTCTGATGTCTTT  
4C ACCACTGACCGTCTCGGGGTCCCTACTTACACTTGGGGGGAGAATGAGTCTGATGTCTTT  
7C ACCACTGACCGTCTCGGGGTCCCTACTTACACTTGGGGGGAGAATGAGTCTGATGTCTTT  
10C ACCACTGACCGTCTCGGGGTCCCTACTTACACTTGGGGGGAGAATGAGTCTGATGTCTTT

5C ACCACTGACCGTCTCGGGGTCCCTACTTACACTTGGGGGGAGAATGAGTCAGATGTCTTT  
3C ACCACTGACCGTCTCGGGGTCCCTACTTACACTTGGGGGGAGAATGAGTCAGATGTCTTT  
\*\*\*\*\*

7A CTTTTGAACTCGACTAGGCCGCCGCGTGGTGCCTGGTTCGGATGCGTGTGGATGAACACT  
6B CTTTTGAACTCGACTAGGCCGCCGCGTGGTGCCTGGTTCGGATGCGTGTGGATGAACACT  
9D CTTTTGAACTCGACTAGGCCGCCGCGTGGTGCCTGGTTCGGATGCGTGTGGATGAACACT  
1D CTTTTGAACTCGACTAGGCCGCCGCGTGGTGCCTGGTTCGGATGCGTGTGGATGAACACT  
8E CTTTTGAACTCGACTAGGCCGCCGCGTGGTGCCTGGTTCGGATGCGTGTGGATGAACACT  
9A CTTTTGAACTCGACTAGGCCGCCGCGTGGTGCCTGGTTCGGATGCGTGTGGATGAACACT  
10D CTTTTGAACTCGACTAGGCCGCCGCGTGGTGCCTGGTTCGGATGCGTGTGGATGAACACT  
3D CTTTTGAACTCGACTAGGCCGCCGCGTGGTGCCTGGTTCGGATGCGTGTGGATGAACACT  
4D CTTTTGAACTCGACTAGGCCGCCGCGTGGTGCCTGGTTCGGATGCGTGTGGATGAACACT  
5D CTTTTGAACTCGACTAGGCCGCCGCGTGGTGCCTGGTTCGGATGCGTGTGGATGAACACT  
10B CTTTTGAACTCGACTAGGCCGCCGCGTGGTGCCTGGTTCGGATGCGTGTGGATGAACACT  
5E CTTTTGAACTCGACTAGGCCGCCGCGTGGTGCCTGGTTCGGATGCGTGTGGATGAACACT  
1E CTTTTGAACTCGACTAGGCCGCCGCGTGGTGCCTGGTTCGGATGCGTGTGGATGAACACT  
7D CTTTTGAACTCGACTAGGCCGCCGCGTGGTGCCTGGTTCGGATGCGTGTGGATGAACACT  
2D CTTTTGAACTCGACTAGGCCGCCGCGTGGTGCCTGGTTCGGATGCGTGTGGATGAACACT  
2E CTTTTGAACTCGACTAGGCCGCCGCGTGGTGCCTGGTTCGGATGCGTGTGGATGAACACT  
6E CTTTTGAACTCGACTAGGCCGCCGCGTGGTGCCTGGTTCGGATGCGTGTGGATGAACACT  
2B CTTTTGAACTCGACTAGGCCGCCGCGTGGTGCCTGGTTCGGATGCGTGTGGATGAACACT  
3B CTTTTGAACTCGACTAGGCCGCCGCGTGGTGCCTGGTTCGGATGCGTGTGGATGAACACT  
6D CTTTTGAACTCGACTAGGCCGCCGCGTGGTGCCTGGTTCGGATGCGTGTGGATGAACACT  
9C CTTTTGAACTCGACTAGGCCGCCGCGTGGTGCCTGGTTCGGATGCGTGTGGATGAACACT  
2C CTTTTGAACTCGACTAGGCCGCCGCGTGGTGCCTGGTTCGGATGCGTGTGGATGAACACT  
5A CTTTTGAACTCGACTAGGCCGCCGCGTGGTGCCTGGTTCGGATGCGTGTGGATGAACACT  
8A CTTTTGAACTCGACTAGGCCGCCGCGTGGTGCCTGGTTCGGATGCGTGTGGATGAACACT  
3E CTTTTGAACTCGACTAGGCCGCCGCGTGGTGCCTGGTTCGGATGCGTGTGGATGAACACT  
4E CTTTTGAACTCGACTAGGCCGCCGCGTGGTGCCTGGTTCGGATGCGTGTGGATGAACACT  
10A CTTTTGAACTCGACTAGGCCGCCGCGTGGTGCCTGGTTCGGATGCGTGTGGATGAACACT  
7B CTTTTGAACTCGACTAGGCCGCCGCGTGGTGCCTGGTTCGGATGCGTGTGGATGAACACT  
6C CTTTTGAACTCGACTAGGCCGCCGCGTGGTGCCTGGTTCGGATGCGTGTGGATGAACACT  
8C CTTTTGAACTCGACTAGGCCGCCGCGTGGTGCCTGGTTCGGATGCGTGTGGATGAACACT  
1C CTTTTGAACTCGACTAGGCCGCCGCGTGGTGCCTGGTTCGGATGCGTGTGGATGAACACT  
4C CTTTTGAACTCGACTAGGCCGCCGCGTGGTGCCTGGTTCGGATGCGTGTGGATGAACACT  
7C CTTTTGAACTCGACTAGGCCGCCGCGTGGTGCCTGGTTCGGATGCGTGTGGATGAACACT  
10C CTTTTGAACTCGACTAGGCCGCCGCGTGGTGCCTGGTTCGGATGCGTGTGGATGAACACT  
5C CTTTTGAACTCGACTAGGCCGCCGCGTGGTGCCTGGTTCGGATGCGTGTGGATGAACACT  
3C CTTTTGAACTCGACTAGGCCGCCGCGTGGTGCCTGGTTCGGATGCGTGTGGATGAACACT  
\*\*\*\*\*

7A ACCGGGTTTACGAAAACCTGCGGCGCTCCTCCATGCGAGGTCAGGGCCAATGCAACCTGG  
6B ACCGGGTTTACGAAAACCTGCGGCGCTCCTCCATGCGAGGTCAGGGCCAATGCAACCTGG  
9D ACCGGGTTTACGAAAACCTGCGGCGCTCCTCCATGCGAGGTCAGGGCCAATGCAACCTGG  
1D ACCGGGTTTACGAAAACCTGCGGCGCTCCTCCATGCGAGGTCAGGGCCAATGCAACCTGG  
8E ACCGGGTTTACGAAAACCTGCGGCGCTCCTCCATGCGAGGTCAGGGCCAATGCAACCTGG  
9A ACCGGGTTTACGAAAACCTGCGGCGCTCCTCCATGCGAGGTCAGGGCCAATGCAACCTGG  
10D ACCGGGTTTACGAAAACCTGCGGCGCTCCTCCATGCGAGGTCAGGGCCAATGCAACCTGG  
3D ACCGGGTTTACGAAAACCTGCGGCGCTCCTCCATGCGAGGTCAGGGCCAATGCAACCTGG  
4D ACCGGGTTTACGAAAACCTGCGGCGCTCCTCCATGCGAGGTCAGGGCCAATGCAACCTGG  
5D ACCGGGTTTACGAAAACCTGCGGCGCTCCTCCATGCGAGGTCAGGGCCAATGCAACCTGG  
10B ACCGGGTTTACGAAAACCTGCGGCGCTCCTCCATGCGAGGTCAGGGCCAATGCAACCTGG  
5E ACCGGGTTTACGAAAACCTGCGGCGCTCCTCCATGCGAGGTCAGGGCCAATGCAACCTGG  
1E ACCGGGTTTACGAAAACCTGCGGCGCTCCTCCATGCGAGGTCAGGGCCAATGCAACCTGG  
7D ACCGGGTTTACGAAAACCTGCGGCGCTCCTCCATGCGAGGTCAGGGCCAATGCAACCTGG  
2D ACCGGGTTTACGAAAACCTGCGGCGCTCCTCCATGCGAGGTCAGGGCCAATGCAACCTGG

2E ACCGGGTTTACGAAAACCTGCGGTGCTCCTCCATGCGAGGTCAGGGCCAATAGAACCTGG  
6E ACCGGGTTTACGAAAACCTGCGGTGCTCCTCCATGCGAGGTCAGGGCCAATAGAACCTGG  
2B ACCGGGTTTACGAAAACCTGCGGTGCTCCTCCATGCGAGGTCAGGGCCAATAGAACCTGG  
3B ACCGGGTTTACGAAAACCTGCGGTGCTCCTCCATGCGAGGTCAGGGCCAATAGAACCTGG  
6D ACCGGGTTTACGAAAACCTGCGGTGCTCCTCCATGCGAGGTCAGGGCCAATAGAACCTGG  
9C ACCGGGTTTACGAAAACCTGCGGTGCTCCTCCATGCGAGGTCAGGGCCAATAGAACCTGG  
2C ACCGGGTTTACGAAAACCTGCGGTGCTCCTCCATGCGAGGTCAGGGCCAATAGAACCTGG  
5A ACCGGGTTTACGAAAACCTGCGGTGCTCCTCCATGCGAGGTCAGGGCCAATAGAACCTGG  
8A ACCGGGTTTACGAAAACCTGCGGTGCTCCTCCATGCGAGGTCAGGGCCAATAGAGCCTGG  
3E ACCGGGTTTACGAAAACCTGCGGTGCTCCTCCATGCGAGGTCAGGGCCAATAGAACCTGG  
4E ACCGGGTTTACGAAAACCTGCGGTGCTCCTCCATGCGAGGTCAGGGCCAATAGAACCTGG  
10A ACCGGGTTTACGAAAACCTGCGGTGCTCCTCCATGCGAGGTCAGGGCCAATAGAACCTGG  
7B ACCGGGTTTACGAAAACCTGCGGTGCTCCTCCATGCGAGGTCAGGGCCAATAGAACCTGG  
6C ACCGGGTTTACGAAAACCTGCGGTGCTCCTCCATGCGAGGTCAGGGCCAATAGAACCTGG  
8C ACCGGGTTTACGAAAACCTGCGGTGCTCCTCCATGCGAGGTCAGGGCCAATAGAACCTGG  
1C ACCGGGTTTACGAAAACCTGCGGTGCTCCTCCATGCGAGGTCAGGGCCAATAGAACCTGG  
4C ACCGGGTTTACGAAAACCTGCGGTGCTCCTCCATGCGAGGTCAGGGCCAATAGAACCTGG  
7C ACCGGGTTTACGAAAACCTGCGGTGCTCCTCCATGCGAGGTCAGGGCCAATAGAACCTGG  
10C ACCGGGTTTACGAAAACCTGCGGTGCTCCTCCATGCGAGGTCAGGGCCAATAGAACCTGG  
5C ACCGGGTTTACGAAAACCTGCGGTGCTCCTCCATGCGAGGTCAGGGCCAATAGAACCTGG  
3C ACCGGGTTTACGAAAACCTGCGGTGCTCCTCCATGCGAGGTCAGGGCCAATAGAACCTGG

\*\*\*\*\* \* \*\*\*\*\*

7A CGCTGCCCCACTGACTGCTTCAGGAAACACCCGGAGACTACCTACACCAAATGCGGGTCA  
6B CATTGCCCCACTGACTGCTTCAGGAAACACCCGGAGACTACCTACACCAAATGCGGGTCA  
9D CACTGCCCCACTGACTGCTTCAGGAAACACCCGGAGACTACCTACACCAAATGCGGGTCA  
1D CATTGCCCCACTGACTGCTTCAGGAAACACCCGGAGACTACCTACACCAAATGCGGGTCA  
8E CATTGCCCCACTGACTGCTTCAGGAAACACCCGGAGACTACCTACACCAAATGCGGGTCA  
9A TACTGCCCCACTGACTGCTTCAGGAAACACCCGGAGACTACCTACACCAAATGCGGGTCA  
10D CGCTGCCCCACTGACTGCTTCAGGAAACATCCGGAGACTACCTACGCCAAATGCGGGTCA  
3D CGCTGCCCCACTGACTGCTTCAGAAAACATCCGGAGACTACCTACGCCAAATGCGGGTCA  
4D CGCTGCCCCACTGACTGCTTCAGAAAACATCCGGAGACTACCTACGCCAAATGCGGGTCA  
5D CGCTGCCCCACTGACTGCTTCAGAAAACATCCGGAGACTACCTACGCCAAATGCGGGTCA  
10B CGCTGCCCCACTGACTGCTTCAGAAAACATCCGGAGACTACCTACGCCAAATGCGGGTCA  
5E CGCTGCCCCACTGACTGCTTCAGAAAACATCCGGAGACTACCTACGCCAAATGCGGGTCA  
1E CGCTGCCCCACTGACTGCTTCAGAAAACATCCGGAGACTACCTACGCCAAATGCGGGTCA  
7D CGCTGCCCCACTGACTGCTTCAGAAAACATCCGGAGACTACCTACGCCAAATGCGGGTCA  
2D CGCTGCCCCACTGACTGCTTCAGAAAACATCCGGAGACTACCTACGCCAAATGCGGGTCA  
2E CGCTGCCCCACTGACTGCTTCAGAAAACATCCGGAGACTACCTACGCCAAATGCGGGTCA  
6E CGCTGCCCCACTGACTGCTTCAGAAAACATCCGGAGACTACCTACGCCAAATGCGGGTCA  
2B TACTGCCCCACTGACTGCTTCAGGAAACACCCGGAGACTACCTACACCAAATGCGGGTCA  
3B CGCTGCCCCACTGACTGCTTCAGGAAACATCCGGAGACTACCTACGCCAAATGCGGGTCA  
6D CGCTGCCCCACTGACTGCTTCAGAAAACATCCGGAGACTACCTACGCCAAATGCGGGTCA  
9C CGCTGCCCCACTGACTGCTTCAGAAAACATCCGGAGACTACCTACGCCAAATGCGGGTCA  
2C CGCTGCCCCACTGACTGCTTCAGAAAACATCCGGAGACTACCTACGCCAAATGCGGGTCA  
5A CGCTGCCCCACTGACTGCTTCAGAAAACATCCGGAGACTACCTACGCCAAATGCGGGTCA  
8A CGCTGCCCCACTGACTGCTTCAGAAAACATCCGGAGACTACCTACGCCAAATGCGGGTCA  
3E CGCTGCCCCACTGACTGCTTCAGAAAACATCCGGAGACTACCTACGCCAAATGCGGGTCA  
4E CGCTGCCCCACTGACTGCTTCAGAAAACATCCGGAGACTACCTACGCCAAATGCGGGTCA  
10A CGCTGCCCCACTGACTGCTTCAGAAAACATCCGGAGACTACCTACGCCAAATGCGGGTCA  
7B CGCTGCCCCACTGACTGCTTCAGAAAACATCCGGAGACTACCTACGCCAAATGCGGGTCA  
6C CGCTGCCCCACTGACTGCTTCAGAAAACATCCGGAGACTACCTACGCCAAATGCGGGTCA  
8C CGCTGCCCCACTGACTGCTTCAGAAAACATCCGGAGACTACCTACGCCAAATGCGGGTCA  
1C CGCTGCCCCACTGACTGCTTCAGAAAACATCCGGAGACTACCTACGCCAAATGCGGGTCA  
4C CGCTGCCCCACTGACTGCTTCAGAAAACATCCGGAGACTACCTACGCCAAATGCGGGTCA  
7C CGCTGCCCCACTGACTGCTTCAGAAAACATCCGGAGACTACCTACGCCAAATGCGGGTCA  
10C CGCTGCCCCACTGACTGCTTCAGAAAACATCCGGAGACTACCTACGCCAAATGCGGGTCA

5C CGCTGCCCCACTGACTGCTTCAGAAAACATCCGGAGACTACCTACGCCAAATGCGGGTCA  
3C CGCTGCCCCACTGACTGCTTCAGAAAACATCCGGAGACTACCTACGCCAAATGCGGGTCA  
\*\*\*\*\*

7A GGGCCCTGGATCACACCACGATGCCTGATTCAATATCCATACCGGCTATGGCATTATCCA  
6B GGGCCCTGGATCACACCACGATGCCTGATTCAATATCCATACCGGCTATGGCATTATCCA  
9D GGGCCCTGGATCACACCACGATGCCTGATTCAATATCCATACCGGCTATGGCATTATCCA  
1D GGGCCCTGGATCACACCACGATGCCTGATTCAATATCCATACCGGCTATGGCATTATCCA  
8E GGGCCCTGGATCACACCACGATGCCTGATTCAATATCCATACCGGCTATGGCATTATCCA  
9A GGGCCCTGGATCACACCACGATGCCTGATTCAATATCCATATCGGCTATGGCATTATCCA  
10D GGGCCCTGGATCACACCACGATGCCTGATTCAATATCCATACCGGCTATGGCATTATCCA  
3D GGGCCCTGGATCACACCACGATGCCTGATTCAATATCCATACCGGCTATGGCATTATCCA  
4D GGGCCCTGGATCACACCACGATGCCTGATTCAATATCCATACCGGCTATGGCATTATCCA  
5D GGGCCCTGGATCACACCACGATGCCTGATTCAATATCCATACCGGCTATGGCATTATCCA  
10B GGGCCCTGGATCACACCACGATGCCTGATTCAATATCCATACCGGCTATGGCATTATCCA  
5E GGGCCCTGGATCACACCACGATGCCTGATTCAATATCCATACCGGCTATGGCATTATCCA  
1E GGGCCCTGGATCACACCACGATGCCTGATTCAATATCCATACCGGCTATGGCATTATCCA  
7D GGGCCCTGGATCACACCACGATGCCTGATTCAATATCCATACCGGCTATGGCATTATCCA  
2D GGGCCCTGGATCACACCACGATGCCTGATTCAATATCCATACCGGCTATGGCATTATCCA  
2E GGGCCCTGGATCACACCACGATGCCTGATTCAATATCCATACCGGCTATGGCATTATCCA  
6E GGGCCCTGGATCACACCACGATGCCTGATTCAATATCCATACCGGCTATGGCATTATCCA  
2B GGGCCCTGGATCACACCACGATGCCTGATTCAATATCCATACCGGCTATGGCATTATCCA  
3B GGGCCCTGGATCACACCACGATGCCTGATTCAATATCCATACCGGCTATGGCATTATCCA  
6D GGGCCCTGGATCACACCACGATGCCTGATTCAATATCCATACCGGCTATGGCATTATCCA  
9C GGGCCCTGGATCACACCACGATGCCTGATTCAATATCCATACCGGCTATGGCATTATCCA  
2C GGGCCCTGGATCACACCACGATGCCTGATTCAATATCCATACCGGCTATGGCATTATCCA  
5A GGGCCCTGGATCACACCACGATGCCTGATTCAATATCCATACCGGCTATGGCATTATCCA  
8A GGGCCCTGGATCACACCACGATGCCTGATTCAATATCCATACCGGCTATGGCATTATCCA  
3E GGGCCCTGGATCACACCACGATGCCTGATTCAATATCCATACCGGCTATGGCATTATCCA  
4E GGGCCCTGGATCACACCACGATGCCTGATTCAATATCCATACCGGCTATGGCATTATCCA  
10A GGGCCCTGGATCACACCACGATGCCTGATTCAATATCCATACCGGCTATGGCATTATCCA  
7B GGGCCCTGGATCACACCACGATGCCTGATTCAATATCCATACCGGCTATGGCATTATCCA  
6C GGGCCCTGGATCACACCACGATGCCTGATTCAATATCCATACCGGCTATGGCATTATCCA  
8C GGGCCCTGGATCACACCACGATGCCTGATTCAATATCCATACCGGCTATGGCATTATCCA  
1C GGGCCCTGGATCACACCACGATGCCTGATTCAATATCCATACCGGCTATGGCATTATCCA  
4C GGGCCCTGGATCACACCACGATGCCTGATTCAATATCCATACCGGCTATGGCATTATCCA  
7C GGGCCCTGGATCACACCACGATGCCTGATTCAATATCCATACCGGCTATGGCATTATCCA  
10C GGGCCCTGGATCACACCACGATGCCTGATTCAATATCCATACCGGCTATGGCATTATCCA  
5C GGGCCCTGGATCACACCACGATGCCTGATTCAATATCCATACCGGCTATGGCATTATCCA  
3C GGGCCCTGGATCACACCACGATGCCTGATTCAATATCCATACCGGCTATGGCATTATCCA  
\*\*\*\*\*

7A TGCACCGTCAACTTTACCGTCTTTAAGATCAGGACATTTATTGGCGGTATAGAGCATCGG  
6B TGCACCGTCAACTTTACCATCTTTAAGATCAGGACATTTATTGGCGGTATAGAGCATCGG  
9D TGCACCGTCAACTTTACCGTCTTTAAGATCAGGACATTTATTGGCGGTATAGAGCATCGG  
1D TGCACCGTCAACTTTACCATCTTTAAGATCAGGACATTTATTGGCGGTATAGAGCATCGG  
8E TGCACCGTCAACTTTACCATCTTTAAGATCAGGACATTTATTGGCGGTATAGAGCATCGG  
9A TGCACCGTCAACTTTACCATCTTTAAGATCAGGACATTTATTGGCGGTATAGAGCATCGG  
10D TGCACCGTCAACTTTACCATCTTTAAGATCAGGACATTTGTTGGCGGTATAGAACATCGG  
3D TGCACCGTCAACTTTACCATCTTTAAGATCAGGACATTTGTTGGCGGTATAGAGCATCGG  
4D TGCACCGTCAACTTTACCATCTTTAAGATCAGGACATTTGTTGGCGGTATAGAGCATCGG  
5D TGCACCGTCAACTTTACCATCTTTAAGATCAGGACATTTGTTGGCGGTATAGAGCATCGG  
10B TGCACCGTCAACTTTACCATCTTTAAGATCAGGACATTTGTTGGCGGTATAGAGCATCGG  
5E TGCACCGTCAACTTTACCATCTTTAAGATCAGGACATTTGTTGGCGGTATAGAGCATCGG  
1E TGCACCGTCAACTTTACCATCTTTAAGATCAGGACATTTGTTGGCGGTATAGAGCATCGG  
7D TGCACCGTCAACTTTACCATCTTTAAGATCAGGACATTTGTTGGCGGTATAGAGCATCGG  
2D TGCACCGTCAACTTTACCATCTTTAAGATCAGGACATTTGTTGGCGGTATAGAGCATCGG

2E TGCACCGTCAACTTTACCATCTTTAAGATCAGGACATTTGTTGGCGGTATAGAGCATCGG  
6E TGCACCGTCAACTTTACCATCTTTAAGATCAGGACATTTGTTGGCGGTATAGAGCATCGG  
2B TGCACCGTCAACTTTACCATCTTTAAGATCAGGACATTTATTGGCGGTATAGAGCATCGG  
3B TGCACCGTCAACTTTACCATCTTTAAGATCAGGACATTTGTTGGCGGTATAGAACATCGG  
6D TGCACCGTCAACTTTACCATCTTTAAGATCAGGACATTTGTTGGCGGTATAGAGCATCGG  
9C TGCACCGTCAACTTTACCATCTTTAAGATCAGGACATTTGTTGGCGGTATAGAGCATCGG  
2C TGCACCGTCAACTTTACCATCTTTAAGATCAGGACATTTGTTGGCGGTATAGAGCATCGG  
5A TGCACCGTCAACTTTACCATCTTTAAGATCAGGACATTTGTTGGCGGTATAGAGCATCGG  
8A TGCACCGTCAACTTTACCATCTTTAAGATCAGGACATTTGTTGGCGGTATAGAGCATCGG  
3E TGCACCGTCAACTTTACTATCTTTAAGATCAGGACATTTGTTGGCGGTATAGAGCATCGG  
4E TGCACCGTCAACTTTACCATCTTTAAGATCAGGACATTTGTTGGCGGTATAGAGCATCGG  
10A TGCACCGTCAACTTTACCATCTTTAAGATCAGGACATTTGTTGGCGGTATAGAGCATCGG  
7B TGCACCGTCAACTTTACCATCTTTAAGATCAGGACATTTGTTGGCGGTATAGAGCATCGG  
6C TGCACCGTCAACTTTACCATCTTTAAGATCAGGACATTTGTTGGCGGTATAGAGCATCGG  
8C TGCACCGTCAACTTTACCATCTTTAAGATCAGGACATTTGTTGGCGGTATAGAGCATCGG  
1C TGCACCGTCAACTTTACCATCTTTAAGATCAGGACATTTGTTGGCGGTATAGAGCATCGG  
4C TGCACCGTCAACTTTACCATCTTTAAGATCAGGACATTTGTTGGCGGTATAGAGCATCGG  
7C TGCACCGTCAACTTTACCATCTTTAAGATCAGGACATTTGTTGGCGGTATAGAGCATCGG  
10C TGCACCGTCAACTTTACCATCTTTAAGATCAGGACATTTGTTGGCGGTATAGAGCATCGG  
5C TGCACCGTCAACTTTACCATCTTTAAGATCAGGACATTTGTTGGCGGTATAGAGCATCGG  
3C TGCACCGTCAACTTTACCATCTTTAAGATCAGGACATTTGTTGGCGGTATAGAGCATCGG  
\*\*\*\*\*

7A ATGGAAGCGGCGTGAATTTGGACCAGGGGAGAAGTTTGTGGCTTGGAGCATAGGGATCGC  
6B ATGGAAGCAGCGTGAATTTGGACCAGGGGAGAAGTTTGTGGCTTGGAGCATAGGGATCGC  
9D ATGGAAGCGGCGTGAATTTGGACCAGGGGAGAAGTTTGTGGCTTGGAGCATAGGGATCGC  
1D ATGGAAGCGGCGTGAATTTGGACCAGGGGAGAAGTTTGTGGCTTGGAGCATAGGGATCGC  
8E ATGGAAGCGGCGTGAATTTGGACCAGGGGAGAAGTTTGTGGCTTGGAGCATAGGGATCGC  
9A ATGGAAGCGGCGTGAATTTGGACCAGGGGAGAAGTTTGTGGCTTGGAGCATAGGGATCGC  
10D ATGGAACGGCGTGAATTTGGACCAGGGGAGAAGTTTGTGGCTTGGAGCATAGGGATCGC  
3D ATGGAAGCGGCGTGAATTTGGACCAGGGGAGAAGTTTGTGGCTTGGAGCATAGGGATCGC  
4D ATGGAAGCGGCGTGAATTTGGACCAGGGGAGAAGTTTGTGGCTTGGAGCATAGGGATCGC  
5D ATGGAAGCGGCGTGAATTTGGACCAGGGGAGAAGTTTGTGGCTTGGAGCATAGGGATCGC  
10B ATGGAAGCGGCGTGAATTTGGACCAGGGGAGAAGTTTGTGGCTTGGAGCATAGGGATCGC  
5E ATGGAAGCGGCGTGAATTTGGACCAGGGGAGAAGTTTGTGGCTTGGAGCATAGGGATCGC  
1E ATGGAAGCGGCGTGAATTTGGACCAGGGGAGAAGTTTGTGGCTTGGAGCATAGGGATCGC  
7D ATGGAAGCGGCGTGAATTTGGACCAGGGGAGAAGTTTGTGGCTTGGAGCATAGGGATCGC  
2D ATGGAAGCGGCGTGAATTTGGACCAGGGGAGAAGTTTGTGGCTTGGAGCATAGGGATCGC  
2E ATGGAAGCGGCGTGAATTTGGACCAGGGGAGAAGTTTGTGGCTTGGAGCATAGGGATCGC  
6E ATGGAAGCGGCGTGAATTTGGACCAGGGGAGAAGTTTGTGGCTTGGAGCATAGGGATCGC  
2B ATGGAAGCGGCGTGAATTTGGACCAGGGGAGAAGTTTGTGGCTTGGAGCATAGGGATCGC  
3B ATGGAAGCGGCGTGAATTTGGACCAGGGGAGAAGTTTGTGGCTTGGAGCATAGGGATCGC  
6D ATGGAAGCGGCATGAATTTGGACCAGGGGAGAAGTTTGTGGCTTGGAGCATAGGGATCGC  
9C ATGGAAGCGGCGTGAATTTGGACCAGGGGAGAAGTTTGTGGCTTGGAGCATAGGGATCGC  
2C ATGGAAGCGGCGTGAATTTGGACCAGGGGAGAAGTTTGTGGCTTGGAGCATAGGGATCGC  
5A ATGGAAGCGGCGTGAATTTGGACCAGGGGAGAAGTTTGTGGCTTGGAGCATAGGGATCGC  
8A ATGGAAGCGGCGTGAATTTGGACCAGGGGAGAAGTTTGTGGCTTGGAGCATAGGGATCGC  
3E ATGGAAGCGGCGTGAATTTGGACCAGGGGAGAAGTTTGTGGCTTGGAGCATAGGGATCGC  
4E ATGGAAGCGGCGTGAATTTGGACCAGGGGAGAAGTTTGTGGCTTGGAGCATAGGGATCGC  
10A ATGGAAGCGGCGTGAATTTGGACCAGGGGAGAAGTTTGTGGCTTGGAGCATAGGGATCGC  
7B ATGGAAGCGGCGTGAATTTGGACCAGGGGAGAAGTTTGTGGCTTGGAGCATAGGGATCGC  
6C ATGGAAGCGGCGTGAATTTGGACCAGGGGAGAAGTTTGTGGCTTGGAGCATAGGGATCGC  
8C ATGGAAGCGGCGTGAATTTGGACCAGGGGAGAAGTTTGTGGCTTGGAGCATAGGGATCGC  
1C ATGGAAGCGGCGTGAATTTGGACCAGGGGAGAAGTTTGTGGCTTGGAGCATAGGGATCGC  
4C ATGGAAGCGGCGTGAATTTGGACCAGGGGAGAAGTTTGTGGCTTGGAGCATAGGGATCGC  
7C ATGGAAGCGGCGTGAATTTGGACCAGGGGAGAAGTTTGTGGCTTGGAGCATAGGGATCGC  
10C ATGGAAGCGGCGTGAATTTGGACCAGGGGAGAAGTTTGTGGCTTGGAGCATAGGGATCGC



5C ATGGAAGCGGCGTGTAAATTGGACCAGGGGAGAAGTTTGTGGCTTGGAGCATAGGGATCGC  
3C ATGGAAGCGGCGTGTAAATTGGACCAGGGGAGAAGTTTGTGGCTTGGAGCATAGGGATCGC  
\*\*\*\*\* \* \*\* \*\*\*\*\*

7A GTAGAGCTGTCGCCTCTGCTCCTCTCCACCACAACATGGCAAATCCTCCCCTGTTCTTTT  
6B GCAGAGCTGTCACCTTTGCTCCTCTCCACCACAACATGGCAAATCCTCCCCTGTTCTTTT  
9D GTAGAGCTGTCGCCTCTGCTCCTCTCCACCACAACATGGCAAATCCTCCCCTGTTCTTTT  
1D GTAGAGCTGTCGCCTCTGCTCCTCTCCACCACAACATGGCAAATCCTCCCCTGTTCTTTT  
8E GTAGAGCTGTCGCCTCTGCTCCTCTCCACCACAACATGGCAAATCCTCCCCTGTTCTTTT  
9A GCAGAGCTGTCACCTTTGCTCCTCTCCACCACAACATGGCAAATCCTCCCCTGTTCTTTT  
10D GCAGAGCTGTCACCTTTGCTCCTCTCCACCACAACATGGCAAATCCTCCCCTGTTCTTTT  
3D GCAGAGCTGTCACCTTTGCTCCTCTCCACCACAACATGGCAAATCCTCCCCTGTTCTTTT  
4D GCAGAGCTGTCACCTTTGCTCCTCTCCACCACAACATGGCAAATCCTCCCCTGTTCTTTT  
5D GCAGAGCTGTCACCTTTGCTCCTCTCCACCACAACATGGCAAATCCTCCCCTGTTCTTTT  
10B GCAGAGCTGTCACCTTTGCTCCTCTCCACCACAACATGGCAAATCCTCCCCTGTTCTTTT  
5E GCAGAGCTGTCACCTTTGCTCCTCTCCACCACAACATGGCAAATCCTCCCCTGTTCTTTT  
1E GCAGAGCTGTCACCTTTGCTCCTCTCCACCACAACATGGCAAATCCTCCCCTGTTCTTTT  
7D GCAGAGCTGTCACCTTTGCTCCTCTCCACCACAACATGGCAAATCCTCCCCTGTTCTTTT  
2D GCAGAGCTGTCACCTTTGCTCCTCTCCACCACAACATGGCAAATCCTCCCCTGTTCTTTT  
2E GCAGAGCTGTCACCTTTGCTCCTCTCCACCACAACATGGCAAATCCTCCCCTGTTCTTTT  
6E GCAGAGCTGTCACCTTTGCTCCTCTCCACCACAACATGGCAAATCCTCCCCTGTTCTTTT  
2B GCAGAGCTGTCACCTTTGCTCCTCTCCACCACAACATGGCAAATCCTCCCCTGTTCTTTT  
3B GCAGAGCTGTCACCTTTGCTCCTCTCCACCACAACATGGCAAATCCTCCCCTGTTCTTTT  
6D GCAGAGCTGTCACCTTTGCTCCTCTCCACCACAACATGGCAAATCCTCCCCTGTTCTTTT  
9C GCAGAGCTGTCACCTTTGCTCCTCTCCACCACAACATGGCAAATCCTCCCCTGTTCTTTT  
2C GCAGAGCTGTCACCTTTGCTCCTCTCCACCACAACATGGCAAATCCTCCCCTGTTCTTTT  
5A GCAGAGCTGTCACCTTTGCTCCTCTCCACCACAACATGGCAAATCCTCCCCTGTTCTTTT  
8A GCAGAGCTGTCACCTTTGCTCCTCTCCACCACAACATGGCAAATCCTCCCCTGTTCTTTT  
3E GCAGAGCTGTCACCTTTGCTCCTCTCCACCACAACATGGCAAATCCTCCCCTGTTCTTTT  
4E GCAGAGCTGTCACCTTTGCTCCTCTCCACCACAACATGGCAAATCCTCCCCTGTTCTTTT  
10A GCAGAGCTGTCACCTTTGCTCCTCTCCACCACAACATGGCAAATCCTCCCCTGTTCTTTT  
7B GCAGAGCTGTCACCTTTGCTCCTCTCCACCACAACATGGCAAATCCTCCCCTGTTCTTTT  
6C GCAGAGCTGTCACCTCTGCTCCTCTCCACCACAACATGGCAAATCCTCCCCTGTTCTTTT  
8C GCAGAGCTGTCACCTCTGCTCCTCTCCACCACAACATGGCAAATCCTCCCCTGTTCTTTT  
1C GCAGAGCTGTCACCTCTGCTCCTCTCCACCACAACATGGCAAATCCTCCCCTGTTCTTTT  
4C GCAGAGCTGTCACCTCTGCTCCTCTCCACCACAACATGGCAAATCCTCCCCTGTTCTTTT  
7C GCAGAGCTGTCACCTCTGCTCCTCTCCACCACAACATGGCAAATCCTCCCCTGTTCTTTT  
10C GCAGAGCTGTCACCTCTGCTCCTCTCCACCACAACATGGCAAATCCTCCCCTGTTCTTTT  
5C GCAGAGCTGTCACCTCTGCTCCTCTCCACCACAACATGGCAAATCCTCCCCTGTTCTTTT  
3C GCAGAGCTGTCACCTCTGCTCCTCTCCACCACAACATGGCAAATCCTCCCCTGTTCTTTT  
\* \*\*\*\*\* \*\* \*\*\*\*\* \*\*\*\*\* \*\*

7A ACCACCTTGCCTGCCCTTTCTACCGGCTTGATCCACCTCCACCAAATATCGTGGACGTC  
6B ACCACCTTGCCTGCCCTTTCTACCGGCTTGATCCACCTCCACCAAATATCGTGGACGTC  
9D ACCACCTTGCCTGCCCTTTCTACCGGCTTGATCCACCTCCACCAAATATCGTGGACGTC  
1D ACCACCTTGCCTGCCCTTTCTACCGGCTTGATCCACCTCCACCAAATATCGTGGACGTC  
8E ACCACCTTGCCTGCCCTTTCTACCGGCTTGATCCACCTCCACCAAATATCGTGGACGTC  
9A ACCACCTTGCCTGCCCTTTCTACCGGCTTGATCCACCTCCACCAAATATCGTGGACGTC  
10D ACCACCTTGCCTGCCCTTTCTACCGGCTTGATCCACCTCCACCAAATATCGTGGACGTC  
3D ACCACCTTGCCTGCCCTTTCTACCGGCTTGATCCACCTCCACCAAATATCGTGGACGTC  
4D ACCACCTTGCCTGCCCTTTCTACCGGCTTGATCCACCTCCACCAAATATCGTGGACGTC  
5D ACCACCTTGCCTGCCCTTTCTACCGGCTTGATCCACCTCCACCAAATATCGTGGACGTC  
10B ACCACCTTGCCTGCCCTTTCTACCGGCTTGATCCACCTCCACCAAATATCGTGGACGTC  
5E ACCACCTTGCCTGCCCTTTCTACCGGCTTGATCCACCTCCACCAAATATCGTGGACGTC  
1E ACCACCTTGCCTGCCCTTTCTACCGGCTTGATCCACCTCCACCAAATATCGTGGACGTC  
7D ACCACCTTGCCTGCCCTTTCTACCGGCTTGATCCACCTCCACCAAATATCGTGGACGTC  
2D ACCACCTTGCCTGCCCTTTCTACCGGCTTGATCCACCTCCACCAAATATCGTGGACGTC

2E ACCACCTGCCTGCCCTTTCTACCGGCTTGATCCACCTCCACCAAATATCGTGGACGTC  
6E ACCACCTGCCTGCCCTTTCTACCGGCTTGATCCACCTCCACCAAATATCGTGGACGTC  
2B ACCACCTGCCTGCCCTTTCTACCGGCTTGATCCACCTCCACCAAATATCGTGGACGTC  
3B ACCACCTGCCTGCCCTTTCTACCGGCTTGATCCACCTCCACCAAATATCGTGGACGTC  
6D ACCACCTGCCTGCCCTTTCTACCGGCTTGATCCACCTCCACCAAATATCGTGGACGTC  
9C ACCACCTGCCTGCCCTTTCTACCGGCTTGATCCACCTCCACCAAATATCGTGGACGTC  
2C ACCACCTGCCTGCCCTTTCTACCGGCTTGATCCACCTCCACCAAATATCGTGGACGTC  
5A ACCACCTGCCTGCCCTTTCTACCGGCTTGATCCACCTCCACCAAATATCGTGGACGTC  
8A ACCACCTGCCTGCCCTTTCTACCGGCTTGATCCACCTCCACCAAATATCGTGGACGTC  
3E ACCACCTGCCTGCCCTTTCTACCGGCTTGATCCACCTCCACCAAATATCGTGGACGTC  
4E ACCACCTGCCTGCCCTTTCTACCGGCTTGATCCACCTCCACCAAATATCGTGGACGTC  
10A ACCACCTGCCTGCCCTTTCTACCGGCTTGATCCACCTCCACCAAATATCGTGGACGTC  
7B ACCACCTGCCTGCCCTTTCTACCGGCTTGATCCACCTCCACCAAATATCGTGGACGTC  
6C ACCACCTGCCTGCCCTTTCTACCGGCTTGATCCACCTCCACCAAATATCGTGGACGTC  
8C ACCACCTGCCTGCCCTTTCTACCGGCTTGATCCACCTCCACCAAATATCGTGGACGTC  
1C ACCACCTGCCTGCCCTTTCTACCGGCTTGATCCACCTCCACCAAATATCGTGGACGTC  
4C ACCACCTGCCTGCCCTTTCTACCGGCTTGATCCACCTCCACCAAATATCGTGGACGTC  
7C ACCACCTGCCTGCCCTTTCTACCGGCTTGATCCACCTCCACCAAATATCGTGGACGTC  
10C ACCACCTGCCTGCCCTTTCTACCGGCTTGATCCACCTCCACCAAATATCGTGGACGTC  
5C ACCACCTGCCTGCCCTTTCTACCGGCTTGATCCACCTCCACCAAATATCGTGGACGTC  
3C ACCACCTGCCTGCCCTTTCTACCGGCTTGATCCACCTCCACCAAATATCGTGGACGTC

\*\*\*\*\*

7A CAGTACCTTTATGGTGTGGATCTGCGGTGGTATCTTGGGCCCTAAAGTGGGAATATGTG  
6B CAGTACCTTTATGGTGTGGATCTGCGGTGGTATCTTGGGCCCTAAAGTGGGAATATGTG  
9D CAGTACCTTTATGGTGTGGATCTGCGGTGGTATCTTGGGCCCTAAAGTGGGAATATGTG  
1D CAGTACCTTTATGGTGTGGATCTGCGGTGGTATCTTGGGCCCTAAAGTGGGAATATGTG  
8E CAGTACCTTTATGGTGTGGATCTGCGGTGGTATCTTGGGCCCTAAAGTGGGAATATGTG  
9A CAGTACCTTTATGGTGTGGATCTGCGGTGGTATCTTGGGCCCTAAAGTGGGAATATGTG  
10D CAGTACCTTTATGGTGTGGATCTGCGGTGGTATCTTGGGCCCTAAAGTGGGAATATGTG  
3D CAGTACCTTTATGGTGTGGATCTGCGGTGGTATCTTGGGCCCTAAAGTGGGAATATGTG  
4D CAGTACCTTTATGGTGTGGATCTGCGGTGGTATCTTGGGCCCTAAAGTGGGAATATGTG  
5D CAGTACCTTTATGGTGTGGATCTGCGGTGGTATCTTGGGCCCTAAAGTGGGAATATGTG  
10B CAGTACCTTTATGGTGTGGATCTGCGGTGGTATCTTGGGCCCTAAAGTGGGAATATGTG  
5E CAGTACCTTTATGGTGTGGATCTGCGGTGGTATCTTGGGCCCTAAAGTGGGAATATGTG  
1E CAGTACCTTTATGGTGTGGATCTGCGGTGGTATCTTGGGCCCTAAAGTGGGAATATGTG  
7D CAGTACCTTTATGGTGTGGATCTGCGGTGGTATCTTGGGCCCTAAAGTGGGAATATGTG  
2D CAGTACCTTTATGGTGTGGATCTGCGGTGGTATCTTGGGCCCTAAAGTGGGAATATGTG  
2E CAGTACCTTTATGGTGTGGATCTGCGGTGGTATCTTGGGCCCTAAAGTGGGAATATGTG  
6E CAGTACCTTTATGGTGTGGATCTGCGGTGGTATCTTGGGCCCTAAAGTGGGAATATGTG  
2B CAGTACCTTTATGGTGTGGATCTGCGGTGGTATCTTGGGCCCTAAAGTGGGAATATGTG  
3B CAGTACCTTTATGGTGTGGATCTGCGGTGGTATCTTGGGCCCTAAAGTGGGAATATGTG  
6D CAGTACCTTTATGGTGTGGATCTGCGGTGGTATCTTGGGCCCTAAAGTGGGAATATGTG  
9C CAGTACCTTTATGGTGTGGATCTGCGGTGGTATCTTGGGCCCTAAAGTGGGAATATGTG  
2C CAGTACCTTTATGGTGTGGATCTGCGGTGGTATCTTGGGCCCTAAAGTGGGAATATGTG  
5A CAGTACCTTTATGGTGTGGATCTGCGGTGGTATCTTGGGCCCTAAAGTGGGAATATGTG  
8A CAGTACCTTTATGGTGTGGATCTGCGGTGGTATCTTGGGCCCTAAAGTGGGAATATGTG  
3E CAGTACCTTTATGGTGTGGATCTGCGGTGGTATCTTGGGCCCTAAAGTGGGAATATGTG  
4E CAGTACCTTTATGGTGTGGATCTGCGGTGGTATCTTGGGCCCTAAAGTGGGAATATGTG  
10A CAGTACCTTTATGGTGTGGATCTGCGGTGGTATCTTGGGCCCTAAAGTGGGAATATGTG  
7B CAGTACCTTTATGGTGTGGATCTGCGGTGGTATCTTGGGCCCTAAAGTGGGAATATGTG  
6C CAGTACCTTTATGGTGTGGATCTGCGGTGGTATCTTGGGCCCTAAAGTGGGAATATGTG  
8C CAGTACCTTTATGGTGTGGATCTGCGGTGGTATCTTGGGCCCTAAAGTGGGAATATGTG  
1C CAGTACCTTTATGGTGTGGATCTGCGGTGGTATCTTGGGCCCTAAAGTGGGAATATGTG  
4C CAGTACCTTTATGGTGTGGATCTGCGGTGGTATCTTGGGCCCTAAAGTGGGAATATGTG  
7C CAGTACCTTTATGGTGTGGATCTGCGGTGGTATCTTGGGCCCTAAAGTGGGAATATGTG  
10C CAGTACCTTTATGGTGTGGATCTGCGGTGGTATCTTGGGCCCTAAAGTGGGAATATGTG

```

5C      CAGTACCTTTATGGTGTGGATCTGCGGTGGTATCTTGGGCCCTAAGGTGGGAATATGTG
3C      CAGTACCTTTATGGTGTGGATCTGCGGTGGTATCTTGGGCCCTAAGGTGGGAATATGTG
*****
7A      GTGCTCGCGTTCCTGCTTCTTGCAGACGCGAGAGTCTCCCGCTGCCTATGAT
6B      GTGCTTGC GTTCCTGCTTCTTGCAGACGCGAGAGTCTCCCGCTGCCTATGGA
9D      GTGCTTGC GTTCCTGCTTCTTGCAGACGCGAGAGTCTCCCGCTGCCTATGAT
1D      GTGCTCGCGTTCCTGCTTCTTGCAGACGCGAGAGTCTCCCGCTGCCTATGAT
8E      GTGCTCGCGTTCCTGCTTCTTGCAGACGCGAGAGTCTCCCGCTGCCTATGAT
9A      GTGCTCGCGTTCCTGCTTCTTGCAGACGCGAGAGTCTCCCGCTGCCTATGAT
10D     GTGCTTGC GTTCCTGCTTCTTGCAGACGCGAGAGTCTCCCGCTGCCTATGAT
3D      GTGCTTGC GTTCCTGCTTCTTGCAGACGCGAGAGTCTCCCGCTGCCTATGAT
4D      GTGCTTGC GTTCCTGCTTCTTGCAGACGCGAGAGTCTCCCGCTGCCTATGAT
5D      GTGCTTGC GTTCCTGCTTCTTGCAGACGCGAGAGTCTCCCGCTGCCTATGAT
10B     GTGCTTGC GTTCCTGCTTCTTGCAGACGCGAGAGTCTCCCGCTGCCTATGAT
5E      GTGCTTGC GTTCCTGCTTCTTGCAGACGCGAGAGTCTCCCGCTGCCTATGAT
1E      GTGCTTGC GTTCCTGCTTCTTGCAGACGCGAGAGTCTCCCGCTGCCTATGAT
7D      GTGCTTGC GTTCCTGCTTCTTGCAGACGCGAGAGTCTCCCGCTGCCTATGAT
2D      GTGCTTGC GTTCCTGCTTCTTGCAGACGCGAGAGTCTCCCGCTGCCTATGAT
2E      GTGCTTGC GTTCCTGCTTCTTGCAGACGCGAGAGTCTCCCGCTGCCTATGAT
6E      GTGCTTGC GTTCCTGCTTCTTGCAGACGCGAGAGTCTCCCGCTGCCTATGAT
2B      GTGCTCGCGTTCCTGCTTCTTGCAGACGCGAGAGTCTCCCGCTGCCTATGAT
3B      GTGCTTGC GTTCCTGCTTCTTGCAGACGCGAGAGTCTCCCGCTGCCTATGAT
6D      GTGCTTGC GTTCCTGCTTCTTGCAGACGCGAGAGTCTCCCGCTGCCTATGAT
9C      GTGCTTGC GTTCCTGCTTCTTGCAGACGCGAGAGTCTCCCGCTGCCTATGAT
2C      GTGCTTGC GTTCCTGCTTCTTGCAGACGCGAGAGTCTCCCGCTGCCTATGAT
5A      GTGCTTGC GTTCCTGCTTCTTGCAGACGCGAGAGTCTCCCGCTGCCTATGAT
8A      GTGCTTGC GTTCCTGCTTCTTGCAGACGCGAGAGTCTCCCGCTGCCTATGAT
3E      GTGCTTGC GTTCCTGCTTCTTGCAGACGCGAGAGTCTCCCGCTGCCTATGAT
4E      GTGCTTGC GTTCCTGCTTCTTGCAGACGCGAGAGTCTCCCGCTGCCTATGAT
10A     GTGCTTGC GTTCCTGCTTCTTGCAGACGCGAGAGTCTCCCGCTGCCTATGAT
7B      GTGCTTGC GTTCCTGCTTCTTGCAGACGCGAGAGTCTCCCGCTGCCTATGAT
6C      GTGCTTGC GTTCCTGCTTCTTGCAGACGCGAGAGTCTCCCGCTGCCTATGAT
8C      GTGCTTGC GTTCCTGCTTCTTGCAGACGCGAGAGTCTCCCGCTGCCTATGAT
1C      GTGCTTGC GTTCCTGCTTCTTGCAGACGCGAGAGTCTCCCGCTGCCTATGGA
4C      GTGCTTGC GTTCCTGCTTCTTGCAGACGCGAGAGTCTCCCGCTGCCTATGAT
7C      GTGCTTGC GTTCCTGCTTCTTGCAGACGCGAGAGTCTCCCGCTGCCTATGAT
10C     GTGCTTGC GTTCCTGCTTCTTGCAGACGCGAGAGTCTCCCGCTGCCTATGAT
5C      GTGCTTGC GTTCCTGCTTCTTGCAGACGCGAGAGTCTCCCGCTGCCTATGAT
3C      GTGCTTGC GTTCCTGCTTCTTGCAGACGCGAGAGTCTCCCGCTGCCTATGAT
*****

```
